# Supplementary material
Source: Research Square preprint supplement (doi:10.21203/rs.3.rs-9024495/v1)
Supplement: Supplementary file 1 [file 4ab5afd1b334a7fb46b52d7f.docx]

**Table 1.** Past introgression supported by D-statistics (D) (Martin et al., 2015). For each test, populations (P) were defined based on our ADMIXTURE groups: pure *C. moreletii,* Mainland *C. acutus lineage (*acutus_A; Mainland), and Cayes *C. acutus lineage* (acutus_B; Cayes). When tested from the direction of *C*. *acutus* into *C. moreletii,* we partitioned pure *C. moreletii* by New River Watershed populations (moreletii_NRW) and outside NRW populations (moreletii_notNRW). For all tests, reference *C. porosus* was used as an outgroup. P-values for D were calculated using a block jackknifing approach. Bolded terms across each row signifies the populations that shared significant gene flow (p < 0.05). P-value of 0 represents a p < 0.0001. Introgression occurred bi-directionally across each group. When gene flow was tested for *C. moreletii* into *C. acutus, C. moreletii* shares a greater proportion of derived states with the Mainland lineage of *C. acutus* (acutus_A). When tested from the direction of *C*. *acutus* into *C. moreletii,* both *C. acutus* lineages have higher rates of gene flow with pure *C. moreletii* populations outside the New River Watershed populations (moreletii_notNRW).

| **P1** | **P2** | **P3** | **D** | **D_jackknife** | **p_value** |
| --- | --- | --- | --- | --- | --- |
| **acutus_A (Mainland)** | acutus_B (Cayes) | ***C. moreletii*** | -0.022 | -0.022 | 0.025 |
| moreletii_NRW | **moreletii_notNRW** | **acutus_A (Mainland)** | 0.109 | 0.109 | 0 |
| moreletii_NRW | **moreletii_notNRW** | **acutus_B (Cayes)** | 0.112 | 0.112 | 0 |
