# Supplementary material
Source: Research Square preprint supplement (doi:10.21203/rs.3.rs-9024495/v1)
Supplement: Supplementary file 1 [file 44765187a58a817358b7af6d.xlsx]

## Sheet: Sheet2
Distance Male
Linkage group	Accension_1	loci_1	Mapped Contig	Mapping Position	Accension_2	loci_2	Mapped Contig	Mapping Position.2	Distance (bp)	cM
LG1	EU593405.1	CpP1103	SciaK46_174	8620615	EU593414.1	CpP1303	SciaK46_607	3521139	5099476	34.7
LG2	EU593393.1	CpP910	SciaK46_883	4578725	EU593352.1	CpP305	SciaK46_883	14684050	10105325	32.7
LG3	EU593416.1	CpP1306	SciaK46_1976	4187749	EU593345.1	CpP214	SciaK46_1274	1691248	2496501	20.7
LG4	EU593435.1	CpP1607	SciaK46_24	29597248	EU593421.1	CpP1404	SciaK46_1441	7750518	21846730	54.5
LG5	EU593503.1	CpP3601	SciaK46_239	7337817	EU593495.1	CpP3402	SciaK46_1389	1922331	5415486	17.2
LG6	EU593525.1	CpP4308	SciaK46_1648	26667152	EU593454.1	CpP2509	SciaK46_2071	1619807	25047345	94.3
LG7	EU593475.1	CpP3008	SciaK46_1368	18556532	EU593504.1	CpP3603	SciaK46_299	909588	17646944	2.1
LG8	EU593511.1	CpP4006	SciaK46_1964	27020484	EU593522.1	CpP4301	SciaK46_1964	29893598	2873114	1.7
LG9									0	0
LG10	EU593491.1	CpP3313	SciaK46_1286	4878353	EU593482.1	CpP3215	SciaK46_1286	12772012	7893659	19.8
LG11									0	0
LG12									0	0
Total									98424580	277.7
Distance Female
Linkage group	Accension_1	loci_1	Mapped Contig	Mapping Position	Accension_2	loci_2	Mapped Contig	Mapping Position.2	Distance (bp)	cM
LG1	EU593405.1	CpP1103	SciaK46_174	8620615	EU593414.1	CpP1303	SciaK46_607	3521139	5099476	476.6
LG2	EU593393.1	CpP910	SciaK46_883	4578725	EU593352.1	CpP305	SciaK46_883	14684050	10105325	297.8
LG3	EU593416.1	CpP1306	SciaK46_1976	4187749	EU593345.1	CpP214	SciaK46_1274	1691248	2496501	214.9
LG4	EU593435.1	CpP1607	SciaK46_24	29597248	EU593421.1	CpP1404	SciaK46_1441	7750518	21846730	114.3
LG5	EU593503.1	CpP3601	SciaK46_239	7337817	EU593495.1	CpP3402	SciaK46_1389	1922331	5415486	180.5
LG6	EU593525.1	CpP4308	SciaK46_1648	26667152	EU593454.1	CpP2509	SciaK46_2071	1619807	25047345	171.8
LG7	EU593475.1	CpP3008	SciaK46_1368	18556532	EU593504.1	CpP3603	SciaK46_299	909588	17646944	17.2
LG8	EU593511.1	CpP4006	SciaK46_1964	27020484	EU593522.1	CpP4301	SciaK46_1964	29893598	2873114	2.2
LG9	EU593406.1	CpP1201	SciaK46_842	1987740	EU593474.1	CpP3004	SciaK46_842	2809785	822045	18.5
LG10	EU593491.1	CpP3313	SciaK46_1286	4878353	EU593482.1	CpP3215	SciaK46_1286	12772012	7893659	25.5
LG11	EU593473.1	CpP3001	SciaK46_1199	3658802	EU593395.1	CpP914	SciaK46_1821	2232561	1426241	88.1
LG12	EU593295.1	CpDi28	SciaK46_993	49950003	EU593500.1	CpP3508	SciaK46_1389	17868263	32081740	18.5
Total									132754606	1625.9
Female Map Length (cM/bp)	Female Map Length (cM/Mb)	Male Map length (cM/bp)	Male Map Length (cM/Mb)	Average Map Length (cM/Mb)
1.22474e-05	12.2474	2.82145e-06	2.82145	7.53443
	LD Half Point (bp)	Recombination Map length (cM/Mbp)	M/MBP	M/bp	r (recombination fraction at LD decay half point - M)	r-squared at initial distance (D0)	r at initial distance (D0)	r-squared at half-LD distance (Dg)	r at half-LD distance (Dg)	Dg/D0	generations	years - 8yrs	years - 10yrs	years - 16.2 yrs	years - 25 yrs
pure C. moreletii	100000	7.53443	0.0753443	7.53443e-08	0.00753443	0.430905	0.656434	0.215453	0.464169	0.707107	45.9987	367.99	459.99	745.18	1149.97
pure C. acutus lineage B (Cayes)	39990	7.53443	0.0753443	7.53443e-08	0.00301302	0.486084	0.697197	0.243042	0.492993	0.707107	115.025	920.2	1150.25	1863.41	2875.63
pure C. acutus lineage A (Mainland)	1280000	7.53443	0.0753443	7.53443e-08	0.0964407	0.631846	0.794888	0.315923	0.56207	0.707107	3.5936	28.75	35.94	58.22	89.8411
pure C. acutus	40000	7.53443	0.0753443	7.53443e-08	0.00301377	0.415427	0.644536	0.207713	0.455756	0.707107	114.997	919.97	1149.97	1862.95	2874.92
All Hybrids	1040000	7.53443	0.0753443	7.53443e-08	0.0783581	0.435709	0.660083	0.217855	0.466749	0.707107	4.4229	35.38	44.23	71.65	110.574
25:75 Hybrids	1260000	7.53443	0.0753443	7.53443e-08	0.0949338	0.522319	0.722717	0.26116	0.511038	0.707107	3.6507	29.21	36.51	59.14	91.2672
40:60 Hybrids	2520000	7.53443	0.0753443	7.53443e-08	0.189868	0.608417	0.780011	0.304208	0.551551	0.707107	1.8253	14.6	18.25	29.57	45.6336
