# Supplementary material
Source: Research Square preprint supplement (doi:10.21203/rs.3.rs-9024495/v1)
Supplement: Supplementary file 2 [file d352340f6a973441afffd74b.docx]

**Table 2.** Estimates of admixture times from linkage disequilibrium (LD) were calculated from our data and fitted to an exponential decay model for populations defined by ADMIXTURE results at K=3. ‘Pure’ population groups are defined as individuals having Q-scores > 90% for their respective groups. Pure *C. acutus* includes individuals from acutus_A (Mainland) and acutus_B (Cayes), in addition to individuals with a Q-score > 90% (and <10% *C. moreletii*) when the Q-scores were summed between the two lineages. LD half-life distance was obtained by finding the midpoint between the distance 0 to the point where LD dropped below 0.1.

| **Population Group** | **LD half-life (Kb)** | **r** | **Generations (g)** | **8yr generation time** | **16.2yr generation time** | **25yr generation time** |
| --- | --- | --- | --- | --- | --- | --- |
| Pure *C. moreletii* | 100 | 0.0075 | 45.9987 | 367.99 | 745.18 | 1149.97 |
| Pure *C. acutus lineage B* (Cayes) | 39.99 | 0.0030 | 115.0254 | 920.2 | 1863.41 | 2875.63 |
| Pure *C. acutus lineage A* (Mainland) | 1280 | 0.0964 | 3.5936 | 28.75 | 58.22 | 89.84 |
| Pure *C. acutus* | 40 | 0.0030 | 114.9966 | 919.97 | 1862.95 | 2874.92 |
| All Hybrids | 1040 | 0.0784 | 4.4229 | 35.38 | 71.65 | 110.57 |
| 25% - 75% Hybrids | 1260 | 0.0949 | 3.6507 | 29.21 | 59.14 | 91.27 |
| 40% - 60% Hybrids | 2520 | 0.1899 | 1.8253 | 14.6 | 29.57 | 45.63 |
