# Supplementary material
Source: Research Square preprint supplement (doi:10.21203/rs.3.rs-9024495/v1)
Supplement: Supplementary file 3 [file 896635bbc98114585238a18c.xlsx]

## Sheet: 3RADmerged_noreponly_metadata_f
Sample	Seq_ID	CrocID	Mark Code	Capture Date	Coordinate Region	Subdivision	Longitude	Latitude	Sampling.Locality	Abbrv_Sampling.Locality	Route	Site	Water Temp (°C)	Air Temp (°C)	Salinity (ppt)	Water pH	Morph_Species	Size Class	Sex	HL (cm)	SL (cm)	CW (cm)	MAX W (cm)	PMax W (cm)	POb L (cm)	POb W (cm)	TL (cm)	SVL (cm)	TW (cm)	HF (cm)	Weight (kg)	Paratrichosoma	Tail Condition	Skin Condition	Musculature Condition	Teeth Condition	Skeletal Structure	Nuchal Photo	Post-Occiptal	Nuchal Scutes	Post-Occipital/Nuchal Pattern	Tansverse Rows	Double Whorls	Single Whorls	Notes	Wounds
CA.P1A12.NC	HS_P1_A12	CA700	700	14/09/2014	Belize	Belize District	-87.9	18	Northern Cayes	NC	Ambergris Caye	Coco Beach	NA	NA	28	NA	CA	A	M	29.2	20.5	NA	NA	NA	NA	NA	193.3	92.9	NA	NA	NA	0	NA	NA	NA	NA	NA	NA	NA	NA	NA	NA	NA	NA	<d2>Pride<d3> - grey teeth, sunken STF, relatively fresh bite marks on tail.	NA
CA.P1B12.NC	HS_P1_B12	CA700B	700(B)	14/09/2014	Belize	Belize District	-87.9	18	Northern Cayes	NC	Ambergris Caye	Coco Beach	NA	NA	28	NA	CA	A	M	29.7	20.8	NA	NA	NA	NA	NA	191.5	99.2	NA	NA	NA	1	NA	NA	NA	NA	NA	NA	NA	NA	NA	NA	NA	NA	<d2>Berlin<d3> - paratrichasoma on abdomen and concentrated on jawline. Glassy teeth, scars on tail	NA
CA.P1C12.NC	HS_P1_C12	CA-700-800-1	700/800(1)	13/09/2014	Belize	Belize District	-87.9	18	Northern Cayes	NC	Ambergris Caye	GBE	NA	NA	NA	NA	CA	A	F	35.3	25.5	NA	NA	NA	NA	NA	229	114.5	NA	NA	NA	0	NA	NA	NA	NA	NA	NA	NA	NA	NA	NA	NA	NA	<d2>Smellen<d3> - emaciated, tail flopped, sunken STF, grey teeth w/ algae	NA
CA.P1D11.NC	HS_P1_D11	CA4	4	21/03/2014	Belize	Belize District	-88	17.9	Northern Cayes	NC	Ambergris Caye	WASA	NA	NA	38	NA	CA	A	M	40	30.1	NA	NA	NA	NA	NA	NA	163.5	NA	NA	NA	0	NA	NA	NA	NA	NA	NA	NA	NA	NA	NA	NA	NA	0A02207739	~150 lb underweight; missing R front arm just south of elbow; Missing L hind just before ankle; Blind in right eye (not popped, clouded &/or marbled?); Chop wounds on bottom jaw up to 4th tooth
CA.P1D12.NC	HS_P1_D12	CA700_800_2	700/800	2014-12-09	Belize	Belize District	-87.9	18	Northern Cayes	NC	Ambergris Caye	Coco Beach	NA	NA	28	NA	CA	A	F	34.1	23.3	NA	NA	NA	NA	NA	220.5	118.3	NA	NA	NA	1	NA	NA	NA	NA	NA	NA	NA	NA	NA	NA	NA	NA	<d2>Toothless<d3>- no teeth, no paratrichasoma, bite wounds on tail and abscess on right hind knee	bite wounds on tail and abscess on right hind knee
CA.P1E11.NC	HS_P1_E11	CA8	8	21/03/2014	Belize	Belize District	-88	17.9	Northern Cayes	NC	Ambergris Caye	MBV	NA	NA	38	NA	CA	SA	F	15.5	19	NA	NA	NA	NA	NA	180	90.6	NA	NA	NA	0	NA	NA	NA	NA	NA	NA	NA	NA	NA	NA	NA	NA	0A02211761	NA
CA.P1E12.NC	HS_P1_E12	CA701	701	17/07/2018	Belize	Belize District	-87.9	18	Northern Cayes	NC	Ambergris Caye	North of Bridge	29.3	28.5	4	8.06	CA	J	M	12	7.2	5.6	3.5	2.9	3.3	2.8	75.8	36.4	15.3	6.7	NA	0	NA	NA	NA	NA	NA	NA	NA	NA	NA	NA	NA	NA	NA	NA
CA.P1F12.NC	HS_P1_F12	CA702	702	17/07/2018	Belize	Belize District	-88	18	Northern Cayes	NC	Ambergris Caye	North of Bridge	29.2	28.7	4	7.64	CA	SA	M	19.7	13.8	7.7	5	3.9	8.1	3.1	122.5	61.3	NA	9.9	NA	1	NA	NA	NA	NA	NA	NA	NA	NA	NA	NA	NA	NA	NA	NA
CA.P1G1.NBDW	HS_P1_G1	CA949	949	2019-08-01	Belize	Belize District	NA	NA	North Belize District Watershed	NBDW	Crooked Tree	North Eastern Lagoon	NA	NA	0	NA	CA	SA	F	22.86	15.24	8.89	7.62	5.33	6.99	4.83	157.48	76.7	35.6	13.3	8.2	1	NA	Good	Good	Fine	Good	y	N	15	A (2 irregular L)	A (16)	M (18)	M (18)	Tail pattern 4 irregular Morelets; Released Sapodilla Lagoon; Microchip: 981020023452852-981	Rehab croc
CA.P1G11.NC	HS_P1_G11	CA10	10	21/03/2014	Belize	Belize District	-88	17.9	Northern Cayes	NC	Ambergris Caye	MBV	NA	NA	38	NA	CA	A	M	31.6	21.2	NA	NA	NA	NA	NA	205.5	108	NA	NA	NA	0	NA	NA	NA	NA	NA	NA	NA	NA	NA	NA	NA	NA	0A02212129	NA
CA.P1G12.NC	HS_P1_G12	CA703	703	17/07/2018	Belize	Belize District	-88	18	Northern Cayes	NC	Ambergris Caye	North of Bridge	29.4	28.2	4	7.82	CA	J	M	10.2	5.8	4.5	2.8	2.2	3.2	1.7	63.6	31.5	11.1	4.9	NA	0	NA	NA	NA	NA	NA	NA	NA	NA	NA	NA	NA	NA	NA	NA
CA.P1H1.NC	HS_P1_H1	CA727	727	29/07/2018	Belize	Belize District	-87.9	18.1	Northern Cayes	NC	Bacalar Chico	West Shore	31.9	27.1	15	NA	CA	J	M	13.8	9	6	3.6	2.5	4.4	2.5	89.3	45.4	17.2	6.9	0.9	0	NA	NA	NA	NA	NA	NA	NA	NA	NA	NA	NA	NA	Mangrove Shallows	NA
CA.P1H11.NC	HS_P1_H11	CA84	84(700)	2014-08-09	Belize	Belize District	-87.9	18	Northern Cayes	NC	Ambergris Caye	GBE	NA	NA	NA	NA	CA	A	F	28.3	18.7	NA	NA	NA	NA	NA	187	95.8	NA	NA	NA	1	NA	NA	NA	NA	NA	NA	NA	NA	NA	NA	NA	NA	<d2>Sweetheart<d3> -paratrichasoma concentrated on neck area	NA
CA.P1H12.NC	HS_P1_H12	CA704	704	18/07/2018	Belize	Belize District	-88	17.9	Northern Cayes	NC	Ambergris Caye	South of WASA	NA	NA	38	NA	CA	J	M	19.4	9.4	6.4	4.3	3.4	4.4	3	89.9	NA	19.9	8.3	1.36	1	NA	NA	NA	NA	NA	Y	NA	NA	NA	NA	NA	NA	NA	NA
CA.P2A2.NC	HS_P2_A2	CA713	713	21/07/2018	Belize	Belize District	-88	18	Northern Cayes	NC	Ambergris Caye	Northwest Shore	30.6	28.9	28	8.25	CA	SA	M	23.5	15.7	9.1	6.2	4.1	5.9	3.9	158.5	80.1	34.7	11.6	14.5	1	NA	NA	NA	NA	NA	NA	NA	NA	NA	NA	NA	NA	Cut did not bleed	NA
CA.P2A3.CC	HS_P2_A3	CA814	814	24/03/2016	Belize	Belize District	-88	17.7	Coastal Cayes	CC	Caye Caulker	CCS	21.4	28.4	45	NA	CA	J	NA	12.3	7.5	3.8	2.7	2.2	3.6	1.5	76.5	36.8	14.5	NA	NA	1	NA	NA	NA	NA	NA	NA	NA	NA	NA	NA	NA	NA	NA	NA
CA.P2A4.CC	HS_P2_A4	CA823	823	2016-04-09	Belize	Belize District	-88	17.8	Coastal Cayes	CC	Caye Caulker	CCN	29.4	27.9	45	NA	CA	J	NA	12.3	7	3.2	NA	NA	3	1.5	76	39	15.5	NA	NA	0	NA	NA	NA	NA	NA	NA	NA	NA	NA	NA	NA	NA	NA	NA
CA.P2A5.CC	HS_P2_A5	CA842	842	14/06/2018	Belize	Belize District	-88	17.8	Coastal Cayes	CC	Caye Caulker	CCN	27.9	27.9	40	NA	CA	A	M	39.9	27	25.5	5.8	12.4	13.2	9.4	225	124	55.3	13.6	55.3	1	NA	NA	NA	NA	NA	NA	NA	NA	NA	NA	NA	NA	Blood sample and genetalia	NA
CA.P2A8.CC	HS_P2_A8	CA808A	808	2016-09-01	Belize	Belize District	-88	17.7	Coastal Cayes	CC	Caye Caulker	CCS	30.2	29.8	42	NA	CA	A	M	35.2	24.1	NA	NA	NA	13.5	5.6	218.5	90.4	NA	NA	NA	1	NA	NA	NA	NA	NA	NA	NA	NA	NA	NA	NA	NA	NAME: ANGEL	NA
CA.P2B1.NC	HS_P2_B1	CA706	706	18/07/2018	Belize	Belize District	-88	17.9	Northern Cayes	NC	Ambergris Caye	South of WASA	28.2	27.9	9	8.38	CA	SA	M	18.6	12.2	7.1	4.4	3.3	7.6	2.3	112.2	56.3	24.1	8.6	4.5	1	NA	NA	NA	NA	NA	NA	NA	NA	NA	NA	NA	NA	NA	NA
CA.P2B2.NC	HS_P2_B2	CA714	714	21/07/2018	Belize	Belize District	-88	18	Northern Cayes	NC	Ambergris Caye	Northwest Shore	30.5	28.9	28	8.25	CA	SA	M	17.4	11.2	6.8	4.4	3.2	4.9	2.9	111.3	56	25	9.1	4.5	0	NA	NA	NA	NA	NA	NA	NA	NA	NA	NA	NA	NA	Prolapsed cloaca	NA
CA.P2B3.CC	HS_P2_B3	CA815	815	25/03/2016	Belize	Belize District	-88	17.8	Coastal Cayes	CC	Caye Caulker	CCN	29.3	27.9	45	NA	CA	SA	F	17.8	11.1	4.2	4.4	2.7	5.5	2.2	111.5	58.3	24	NA	NA	1	NA	NA	NA	NA	NA	NA	NA	NA	NA	NA	NA	NA	NA	NA
CA.P2B4.CC	HS_P2_B4	CA824	824	19/05/2017	Belize	Belize District	-88	17.7	Coastal Cayes	CC	Caye Caulker	CCS	28.1	29.1	45	NA	CA	A	M	30.3	20.8	11.4	9.3	5.6	8.9	4.5	194.6	96.5	48.8	13	NA	0	NA	NA	NA	NA	NA	NA	NA	NA	NA	NA	NA	NA	NA	NA
CA.P2B7.CC	HS_P2_B7	CA801	801	24/03/2014	Belize	Belize District	-88	17.7	Coastal Cayes	CC	Caye Caulker	CCS	NA	NA	42	NA	CA	SA	M	25.4	22.2	NA	NA	NA	NA	NA	172.7	84.8	NA	NA	NA	1	NA	NA	NA	NA	NA	NA	NA	NA	NA	NA	NA	NA	PT on entire bottom jaw, near cloaca, and sid eof stomach	NA
CA.P2B8.CC	HS_P2_B8	CA808B	808	26/03/2014	Belize	Belize District	-88	17.8	Coastal Cayes	CC	Caye Caulker	CCN	NA	NA	40	NA	CA	J	NA	12.8	8	NA	NA	NA	NA	NA	82.4	39.8	NA	NA	NA	0	NA	NA	NA	NA	NA	NA	NA	NA	NA	NA	NA	NA	NA	NA
CA.P2C1.NC	HS_P2_C1	CA707	707	19/07/2018	Belize	Belize District	-87.9	18.1	Northern Cayes	NC	Ambergris Caye	Curtis's Lagoon	30.5	28.9	NA	8.7	CA	J	M	10.6	6.3	4.7	3.2	2.4	2	1.5	67	33.9	12.7	5.8	0.9	0	NA	NA	NA	NA	NA	NA	NA	NA	NA	NA	NA	NA	Refractometer not working	NA
CA.P2C2.NC	HS_P2_C2	CA715	715	21/07/2018	Belize	Belize District	-87.9	18	Northern Cayes	NC	Ambergris Caye	Northwest Shore	30.4	28.5	29	8.24	CA	SA	F	15.2	9.5	6.4	3.9	2.7	4.7	2.4	98.5	49	17.6	7.1	1.8	1	Little skinny	NA	NA	NA	NA	NA	NA	NA	NA	NA	NA	NA	NA	NA
CA.P2C3.CC	HS_P2_C3	CA816	816	25/03/2016	Belize	Belize District	-88	17.8	Coastal Cayes	CC	Caye Caulker	CCN	29.3	27.9	45	NA	CA	J	NA	12.1	7.2	3.3	3	2.2	2.4	1.9	75.1	38.7	15.8	NA	NA	0	NA	NA	NA	NA	NA	NA	NA	NA	NA	NA	NA	NA	NA	NA
CA.P2C4.CC	HS_P2_C4	CA825	825	18/05/2017	Belize	Belize District	-88	17.7	Coastal Cayes	CC	Caye Caulker	CCS	30	27.8	11	NA	CA	J	F	15.7	8.2	6	3.7	2.8	4.2	2.1	88.1	42.5	17.9	6.8	NA	0	NA	NA	NA	NA	NA	NA	NA	NA	NA	NA	NA	NA	Yellow underside	NA
CA.P2C5.CC	HS_P2_C5	CA918	918	2017-12-03	Belize	Belize District	-88	17.7	Coastal Cayes	CC	Caye Caulker	CCS	25.2	27.2	45	NA	CA	A	M	35	23.5	9	11	9	13	5.5	230	109	59.8	15	NA	0	NA	NA	NA	NA	NA	NA	NA	NA	NA	NA	NA	NA	GPS coordites determined by M. Boucher from Google Earth 03/04/2018; Jose	Scarring on snout and tail
CA.P2C7.CC	HS_P2_C7	CA802	802	25/03/2014	Belize	Belize District	-88	17.7	Coastal Cayes	CC	Caye Caulker	CCS	NA	NA	42	NA	CA	SA	M	19.4	12.7	NA	NA	NA	NA	NA	129.2	63.2	NA	NA	NA	1	NA	NA	NA	glassy teeth	NA	NA	NA	NA	NA	NA	NA	NA	PT across abdomen	NA
CA.P2D1.NC	HS_P2_D1	CA708	708	19/07/2018	Belize	Belize District	-87.9	18.1	Northern Cayes	NC	Ambergris Caye	Curtis's Lagoon	31.2	28.1	NA	8.59	CA	A	F	31.7	21	12.2	10.6	7.4	10.8	4.6	206.8	107.9	50.5	16.8	NA	0	NA	NA	NA	NA	NA	NA	NA	NA	NA	NA	NA	NA	NA	NA
CA.P2D2.NC	HS_P2_D2	CA716	716	21/07/2018	Belize	Belize District	-87.9	18	Northern Cayes	NC	Ambergris Caye	Northwest Shore	29.7	28.3	24	8.14	CA	SA	M	14.3	9.8	5.7	3.9	2.9	3.2	2.2	90.3	40.7	17.5	8.2	0.7	0	NA	NA	NA	NA	NA	NA	NA	NA	NA	NA	NA	NA	NA	NA
CA.P2D7.CC	HS_P2_D7	CA804	804	25/03/2014	Belize	Belize District	-88	17.8	Coastal Cayes	CC	Caye Caulker	CCN	NA	NA	45	NA	CA	A	F	33.7	22.2	NA	NA	NA	NA	NA	217.8	110.5	NA	NA	NA	0	NA	NA	NA	NA	NA	NA	NA	NA	NA	NA	NA	NA	NAME: JILLIAN	injury on preorbital hump
CA.P2D8.NC	HS_P2_D8	CA810A	810	2016-02-07	Belize	Belize District	-87.9	18	Northern Cayes	NC	Ambergris Caye	Coco Beach	NA	NA	28	NA	CA	SA	F	36.5	25.5	NA	13	6.5	16.5	5.6	168	123	NA	NA	NA	0	NA	NA	NA	NA	NA	NA	NA	NA	NA	NA	NA	NA	old	NA
CA.P2E1.NC	HS_P2_E1	CA709	709	20/07/2018	Belize	Belize District	-87.9	18	Northern Cayes	NC	Ambergris Caye	Coco Beach	32.7	27.9	28	NA	CA	A	F	38	24.3	14.7	13.6	9.7	10.4	5.6	254	64.5	64.5	20.7	NA	0	NA	NA	NA	NA	NA	NA	NA	NA	NA	NA	NA	NA	NA	NA
CA.P2E3.CC	HS_P2_E3	CA818	818	25/03/2016	Belize	Belize District	-88	17.8	Coastal Cayes	CC	Caye Caulker	CCN	28.9	26	45	NA	CA	SA	NA	15.2	9.4	4	3	2.4	4.7	2.3	92.3	46.5	18	NA	NA	0	NA	NA	NA	NA	NA	NA	NA	NA	NA	NA	NA	NA	NA	NA
CA.P2E4.CC	HS_P2_E4	CA827	827	2018-11-06	Belize	Belize District	-88	17.7	Coastal Cayes	CC	Caye Caulker	CCS	30.1	27.6	42	8.1	CA	J	M	11.7	7.1	3.5	2.3	4.2	3.8	2.8	71.6	37.5	15	6.1	0.9	0	NA	NA	NA	NA	NA	NA	NA	NA	NA	NA	NA	NA	Blood sample and genetalia	NA
CA.P2E5.CC	HS_P2_E5	CA970	970	2017-10-09	Belize	Belize District	-88	17.8	Coastal Cayes	CC	Caye Caulker	CCN	32.2	29.4	23	NA	CA	SA	F	24.8	16.2	9.2	8.5	5.8	4.7	3.4	158	76	37.8	13.7	29	1	NA	NA	NA	NA	NA	NA	NA	NA	NA	NA	NA	NA	NA	Scars
CA.P2E7.CC	HS_P2_E7	CA805	805	26/03/2014	Belize	Belize District	-88	17.8	Coastal Cayes	CC	Caye Caulker	CCN	NA	NA	45	NA	CA	J	NA	8.7	4.8	NA	NA	NA	NA	NA	56.3	29.3	NA	NA	NA	0	NA	NA	NA	NA	NA	NA	NA	NA	NA	NA	NA	NA	NA	scute cut off 500, damaged but Nt cut off by knife, Vince confirmed Nt ours
CA.P2E8.CC	HS_P2_E8	CA810B	810	2016-11-01	Belize	Belize District	-88	17.7	Coastal Cayes	CC	Caye Caulker	CCS	NA	NA	42	NA	CA	A	M	29	20.5	NA	NA	NA	11	4.5	192	92.5	NA	NA	NA	1	NA	NA	NA	NA	NA	NA	NA	NA	NA	NA	NA	NA	NAME: DIRK; WITH FILM CREW	NA
CA.P2F2.NC	HS_P2_F2	CA724B	724	28/07/2018	Belize	Belize District	-87.8	18.1	Northern Cayes	NC	Bacalar Chico	Cante Lagoon North	31.4	27.8	34	NA	CA	A	M	33.4	23.1	12.8	8.9	6.8	10.9	5.7	221.2	111.2	49.1	15.2	36.3	0	NA	NA	NA	NA	NA	NA	NA	NA	NA	NA	NA	NA	Mangrove Shallows	NA
CA.P2F3.CC	HS_P2_F3	CA820	820	25/03/2016	Belize	Belize District	-88	17.8	Coastal Cayes	CC	Caye Caulker	CCN	28.3	26.7	45	NA	CA	A	F	29.1	19.9	7.7	8	4.4	10.3	3.2	249	98.4	46.8	NA	NA	1	NA	NA	NA	NA	NA	NA	NA	NA	NA	NA	NA	NA	Tail tag : Left=Big blue ; Right=Little red	NA
CA.P2F4.CC	HS_P2_F4	CA829	829	2018-11-06	Belize	Belize District	-88	17.7	Coastal Cayes	CC	Caye Caulker	CCS	29.1	27	40	8.6	CA	SA	M	17.7	11.6	7.5	3.4	6.4	4.5	3.5	113	51.8	25	7.5	8.2	1	NA	NA	NA	NA	NA	NA	NA	NA	NA	NA	NA	NA	Blood sample and genetalia	NA
CA.P2F7.CC	HS_P2_F7	CA806	806	26/03/2014	Belize	Belize District	-88	17.8	Coastal Cayes	CC	Caye Caulker	CCN	NA	NA	44	NA	CA	J	NA	13.3	8.6	NA	NA	NA	NA	NA	83.5	43.3	NA	NA	NA	1	NA	NA	NA	NA	NA	NA	NA	NA	NA	NA	NA	NA	PT all over	damanged spot in left forelimb and one in middle
CA.P2F8.NC	HS_P2_F8	CA811	811	2016-05-07	Belize	Belize District	-88	17.9	Northern Cayes	NC	Ambergris Caye	MBV	NA	NA	38	NA	CA	A	F	36.4	25.4	9.5	11	5.7	12.2	5.5	238.5	115	NA	NA	NA	0	NA	NA	NA	NA	NA	NA	NA	NA	NA	NA	NA	NA	NA	Broken R back legs with laceration from bone protrusion
CA.P2G3.CC	HS_P2_G3	CA821	821	26/03/2016	Belize	Belize District	-88	17.7	Coastal Cayes	CC	Caye Caulker	CCS	28.9	27	45	NA	CA	SA	NA	18.6	11.5	4.5	5	3.4	6	3	114.5	56.1	26.5	NA	NA	1	NA	NA	NA	NA	NA	NA	NA	NA	NA	NA	NA	NA	NA	NA
CA.P2G4.CC	HS_P2_G4	CA838B	838	13/06/2018	Belize	Belize District	-88	17.7	Coastal Cayes	CC	Caye Caulker	CCS - Airstrip	27	26.5	50	NA	CA	J	M	8.9	5.2	3.9	2.2	4.1	2.8	1.9	57.5	29.6	11	4.5	0.4	0	NA	NA	NA	NA	NA	NA	NA	NA	NA	NA	NA	NA	Blood sample and genetalia	NA
CA.P2G5.CC	HS_P2_G5	CA800+100	800/100	24/03/2014	Belize	Belize District	-88	17.7	Coastal Cayes	CC	Caye Caulker	CCS	NA	NA	45	NA	CA	SA	M	21.9	14.3	NA	NA	NA	NA	NA	144.2	73.7	NA	NA	NA	0	NA	NA	NA	Glassy teeth	NA	NA	NA	NA	NA	NA	NA	NA	NAME: HISSYFIT	NA
CA.P2G7.CC	HS_P2_G7	CA807A	807	2016-08-01	Belize	Belize District	-88	17.8	Coastal Cayes	CC	Caye Caulker	CCN	NA	30.2	45	NA	CA	A	M	28.1	19.4	NA	NA	NA	9	4	186.6	90.9	NA	NA	NA	1	NA	NA	NA	NA	NA	NA	NA	NA	NA	NA	NA	NA	NAME: TARZAN	NA
CA.P2G8.CC	HS_P2_G8	CA812	812	13/02/2017	Belize	Belize District	-88	17.8	Coastal Cayes	CC	Caye Caulker	CCN	27.8	26.9	45	NA	CA	J	NA	8.2	4.7	4.7	2.4	2	NA	NA	52.4	25	11	4.2	0.4	0	NA	NA	NA	NA	NA	NA	NA	NA	NA	NA	NA	NA	NA	NA
CA.P2H1.NC	HS_P2_H1	CA712	712	21/07/2018	Belize	Belize District	-88	17.9	Northern Cayes	NC	Ambergris Caye	Northwest Shore	30.9	29.5	30	8.14	CA	J	M	10.8	6.4	4.6	3	2.1	3.2	1.2	69	NA	13.8	5.1	0.5	0	NA	NA	NA	NA	NA	NA	NA	NA	NA	NA	NA	NA	NA	NA
CA.P2H5.NA	HS_P2_H5	CATK421B	TK421	22/02/2018	Belize	NA	NA	NA	NA	NA	NA	NA	NA	NA	NA	NA	CA	A	NA	NA	NA	NA	NA	NA	NA	NA	NA	NA	NA	NA	NA	NA	NA	NA	NA	NA	NA	NA	NA	NA	NA	NA	NA	NA	NA	NA
CA.P2H7.CC	HS_P2_H7	CA807B	807	26/03/2014	Belize	Belize District	-88	17.8	Coastal Cayes	CC	Caye Caulker	CCN	29.3	28.2	45	NA	CA	SA	NA	14.8	9.1	NA	NA	NA	NA	NA	96.1	47.6	NA	NA	NA	1	NA	NA	jelly belly	NA	NA	NA	NA	NA	NA	NA	NA	NA	PT on abdomen and tail (FRESH); intermittent sclaes deformities on eyebrow	NA
CA.P2H8.CC	HS_P2_H8	CA813	813	13/02/2017	Belize	Belize District	-88	17.8	Coastal Cayes	CC	Caye Caulker	CCN	27.4	25	45	NA	CA	J	F	14.6	8.3	5.6	4.5	2.9	4.1	2.6	87.3	44	18.1	7.2	1.9	1	NA	NA	NA	NA	NA	NA	NA	NA	NA	NA	NA	NA	NA	NA
CA.P3A11.CC	HS_P3_A11	CA839	839	13/06/2018	Belize	Belize District	-88	17.7	Coastal Cayes	CC	Caye Caulker	CCS- Airstrip	27.3	26.8	50	NA	CA	J	M	8.7	5	3.5	2.1	3.5	3.7	1.9	54.8	26.8	11	4.5	0.4	0	NA	NA	NA	NA	NA	NA	NA	NA	NA	NA	NA	NA	Blood sample and genetalia	NA
CA.P3A9.NC	HS_P3_A9	CA9	9	22/05/2015	Belize	Belize District	-88	17.9	Northern Cayes	NC	Ambergris Caye	WASA	28	NA	42	NA	CA	A	F	37.1	26	NA	NA	NA	NA	NA	241	121	NA	NA	NA	1	NA	NA	NA	NA	NA	NA	NA	NA	NA	NA	NA	NA	NA	NA
CA.P3B10.NC	HS_P3_B10	CA725	725	29/07/2018	Belize	Belize District	-87.9	18.1	Northern Cayes	NC	Bacalar Chico	West Shore	31.7	28.9	17	NA	CA	J	M	13.5	8.5	5.9	3.9	2.5	4.5	2.7	89	44.2	16	7.8	0.9	0	NA	NA	NA	NA	NA	NA	NA	NA	NA	NA	NA	NA	Mangrove Shallows	NA
CA.P3B9.NC	HS_P3_B9	CA717	717	22/07/2018	Belize	Belize District	-88	17.9	Northern Cayes	NC	Ambergris Caye	San Pedro Lagoon- South	31.5	27.9	30	8.16	CA	SA	M	15.4	9.5	6.6	4.3	2.9	3.5	3.1	100	50.3	20.9	8.3	3.6	0	NA	NA	NA	NA	NA	NA	NA	NA	NA	NA	NA	NA	No blood from cuts	NA
CA.P3C10.NC	HS_P3_C10	CA726	726	29/07/2018	Belize	Belize District	-87.9	18.1	Northern Cayes	NC	Bacalar Chico	West Shore	32.3	27.8	20	NA	CA	SA	M	20.8	13.7	8.3	5.5	4.1	6.6	3.7	136	66.5	28	10.9	6.4	0	NA	NA	NA	NA	NA	NA	NA	NA	NA	NA	NA	NA	Mangrove Shallows	NA
CA.P3C9.NC	HS_P3_C9	CA718	718	22/07/2018	Belize	Belize District	-88	17.9	Northern Cayes	NC	Ambergris Caye	San Pedro Lagoon- South	30.2	29	30	8.17	CA	J	M	14.7	8.6	5.7	3.9	3.2	4.3	2.6	89.6	44.8	15.3	8.2	0.9	0	Skinny/ algae on body	NA	NA	NA	NA	NA	NA	NA	NA	NA	NA	NA	NA	NA
CA.P3D10.CC	HS_P3_D10	CA830	830	2018-12-06	Belize	Belize District	-88	17.8	Coastal Cayes	CC	Caye Caulker	CCN	29.3	26.8	42	8.6	CA	SA	F	16	10	7.5	2	6.2	4.6	3.4	100.5	51.3	22.3	9	5.9	1	NA	NA	NA	NA	NA	NA	NA	NA	NA	NA	NA	NA	Blood sample and genetalia	NA
CA.P3D9.NC	HS_P3_D9	CA719	719	23/07/2018	Belize	Belize District	-88	17.9	Northern Cayes	NC	Ambergris Caye	San Pedro Lagoon North	28.9	28.4	46	NA	CA	SA	M	14.6	9.2	6.1	3.8	2.7	3.5	2.7	93.6	46.7	18	7.8	1.4	0	NA	NA	NA	NA	NA	NA	NA	NA	NA	NA	NA	NA	Mangrove shallows;Very little bleeding from scute cut	NA
CA.P3E10.CC	HS_P3_E10	CA833	833	2018-12-06	Belize	Belize District	-88	17.8	Coastal Cayes	CC	Caye Caulker	CCN	30	26.8	44	8.3	CA	A	F	32.6	22	15	6	14.5	10.2	7.2	206.5	114	52.2	13	36.7	1	NA	NA	NA	NA	NA	NA	NA	NA	NA	NA	NA	NA	Blood sample and genetalia	NA
CA.P3E9.NC	HS_P3_E9	CA720	720	26/07/2018	Belize	Belize District	-87.9	18.2	Northern Cayes	NC	Bacalar Chico	Channel to Rocky point	32	28.5	29	NA	CA	SA	M	21.9	14.5	9	6.6	4.7	7.4	3.6	150	87.63	87.63	12.4	NA	1	NA	NA	NA	NA	NA	NA	NA	NA	NA	NA	NA	NA	Mangrove Channel	NA
CA.P3F10.CC	HS_P3_F10	CA834	834	2018-12-06	Belize	Belize District	-88	17.8	Coastal Cayes	CC	Caye Caulker	CCN	28.6	25.8	40	8.4	CA	A	M	34	21.6	15.7	5.4	12.6	11	8.4	201.5	110.9	52.5	15.2	40.4	1	NA	NA	NA	NA	NA	NA	NA	NA	NA	NA	NA	NA	Blood sample and genetalia	NA
CA.P3G10.CC	HS_P3_G10	CA836	836	13/06/2018	Belize	Belize District	-88	17.7	Coastal Cayes	CC	Caye Caulker	CCS- Airstrip	27.2	27.1	45	NA	CA	SA	M	16	9.9	6.8	2.8	6.5	4.6	3.4	100.1	54.6	23.5	7.2	1.4	0	NA	NA	NA	NA	NA	NA	NA	NA	NA	NA	NA	NA	Blood sample and genetalia	NA
CA.P3G9.NC	HS_P3_G9	CA722	722	27/07/2018	Belize	Belize District	-87.9	18.2	Northern Cayes	NC	Bacalar Chico	Cante Lagoon South	31.3	28.7	35	NA	CA	A	M	29.3	19.8	12.4	8	5.8	9	4.6	208.2	104.5	48	15.7	NA	0	NA	NA	NA	NA	NA	NA	NA	NA	NA	NA	NA	NA	Mangrove	Bite wound, L. hind leg
CA.P3H10.CC	HS_P3_H10	CA837	837	13/06/2018	Belize	Belize District	-88	17.7	Coastal Cayes	CC	Caye Caulker	CCS- Airstrip	28.4	27	45	NA	CA	SA	M	14	9.5	7.5	3	5.7	3.8	2.7	91.5	45.9	18.3	7.9	2.3	0	NA	NA	NA	NA	NA	NA	NA	NA	NA	NA	NA	NA	Blood sample and genetalia	NA
CA.P3H9.NC	HS_P3_H9	CA723	723	28/07/2018	Belize	Belize District	-87.8	18.1	Northern Cayes	NC	Bacalar Chico	Cante Lagoon North	31.7	28.7	33	NA	CA	A	F	35.2	25.8	14.1	10.5	7.5	10	5.9	219.2	110.3	50.3	19.8	NA	0	NA	NA	NA	NA	NA	NA	NA	NA	NA	NA	NA	NA	Coagulated thick, dark blood; Mangrove Shallows	NA
CA.P4B1.CC	HS_P4_B1	CA828a	828	2018-11-06	Belize	Belize District	-88	17.7	Coastal Cayes	CC	Caye Caulker	CCS	29.1	27	39	8.6	CA	SA	F	17	11.5	7.5	3.5	7.5	5.5	4	119.2	62.4	26.5	8.5	9.1	1	NA	NA	NA	NA	NA	NA	NA	NA	NA	NA	NA	NA	Blood sample and genetalia	NA
CA.PC10.NC	HS_PC_10	CA705	705	18/07/2018	Belize	Belize District	-88	17.9	Northern Cayes	NC	Ambergris Caye	South of WASA	27.8	28.6	38	7.84	CA	J	M	13.2	7.8	5.4	3.3	2.7	3.3	2.6	80.5	40.6	15.4	6.8	0.9	1	NA	NA	NA	NA	NA	NA	NA	NA	NA	NA	NA	NA	NA	NA
CA.PC11.NC	HS_PC_11	CA710	710	20/07/2018	Belize	Belize District	-88	17.9	Northern Cayes	NC	Ambergris Caye	Southern Belize/ Cangrejo Caye	30.7	29	28	7.92	CA	A	M	40.5	28.5	14.8	14.4	8.2	17	5.3	264.5	131.2	65.5	20.2	NA	1	NA	NA	NA	NA	NA	NA	NA	NA	NA	NA	NA	NA	NA	Sore on left foot
CA.PC12.NC	HS_PC_12	CA843	843	28/07/2018	Belize	Belize District	-87.8	18.1	Northern Cayes	NC	Bacalar Chico	Cante Lagoon North	30.3	28	35	NA	CA	A	F	32.3	23.1	12.6	9.4	6.4	10.2	5.2	201.1	105.2	45.5	15.1	31.8	1	NA	NA	NA	NA	NA	NA	NA	NA	NA	NA	NA	NA	Scute #800 very flat but unclear if it is a cut. Decided to clip to #843	Missing 3rd toe on right front foot, bullet wound in right hind leg.
CA.PC13.CC	HS_PC_13	CA822	822	18/05/2017	Belize	Belize District	-88	17.7	Coastal Cayes	CC	Caye Caulker	CCS	29.7	27.4	36	NA	CA	SA	F	15.8	9.8	5.5	4	3	4.7	2.1	105.4	50.9	23	8	NA	1	NA	NA	NA	NA	NA	NA	NA	NA	NA	NA	NA	NA	NA	NA
CA.PC14.CC	HS_PC_14	CA826	826	2018-11-06	Belize	Belize District	-88	17.7	Coastal Cayes	CC	Caye Caulker	CCS	30.2	27.8	42	8.1	CA	SA	F	21	13.5	8.5	2.2	6.5	6	5	137	NA	31	12.5	6.8	0	NA	NA	NA	NA	NA	NA	NA	NA	NA	NA	NA	NA	Blood sample and genetalia	NA
CA.PC15.CC	HS_PC_15	CA841	841	14/06/2018	Belize	Belize District	-88	17.8	Coastal Cayes	CC	Caye Caulker	CCN	28	27.9	40	NA	CA	J	M	8.2	5.1	3.4	2.1	4	2.9	2	51	25.6	9.4	4.3	0.5	0	NA	NA	NA	NA	NA	NA	NA	NA	NA	NA	NA	NA	Blood sample and genetalia	NA
CA.PC16.CC	HS_PC_16	CA971	971	2017-10-09	Belize	Belize District	-88	17.8	Coastal Cayes	CC	Caye Caulker	CCN	31.8	28.7	25	NA	CA	SA	F	22.8	14.5	8.5	6.3	5.1	6.5	3	153	74	34	12.3	31	1	NA	NA	NA	NA	NA	NA	NA	NA	NA	NA	NA	NA	NA	N
CA.PC9.NC	HS_PC_9	CA721B	721	27/07/2018	Belize	Belize District	-87.8	18.1	Northern Cayes	NC	Bacalar Chico	Cante Lagoon South	31.7	29.2	32	NA	CA	A	M	41.1	26.9	17	14	10	18.5	6	276.5	143	64	24	NA	1	NA	NA	NA	NA	NA	NA	NA	NA	NA	NA	NA	NA	Mangrove Shallows	2 gunshot wounds, right tail
CM.P1A10.NRW	HS_P1_A10	CM1630	1630	2018-02-10	Belize	Orange Walk District	-88.6	18.1	New River Watershed	NRW	New River	Orange Walk North	29	25.8	0	8.15	CM	J	M	4	5.5	4.5	3.5	2	NA	NA	61	29.5	10.5	5	NA	1	Medium	Slight flaking, algae on most of body	Back legs not firm	Very large teeth, some good, others are glassy	Good	NA	NA	NA	NA	NA	NA	NA	NA	NA
CM.P1A11.NRW	HS_P1_A11	CM-HATCH4	11 single	2018-02-10	Belize	Orange Walk District	-88.6	18.1	New River Watershed	NRW	New River	Orange Walk North	28.9	25.3	0	7.82	CM	H	M	4.1	2	2.1	1.4	1	NA	NA	28.1	13.8	5	2.8	NA	0	Good	Good	Good	Glassy	Good	NA	NA	NA	NA	NA	NA	NA	NA	NA
CM.P1A9.NSLW	HS_P1_A9	CM1321	1321	2018-12-08	Belize	Belize District	-88.3	17.3	N/S Lagoon Watershed	NSLW	Gales Point	Southern Lagoon	29.4	26	6	NA	CM	J	F	8.5	4.7	3.1	2.7	1.8	NA	NA	51.3	24.6	4.6	9.3	0.45	0	NA	NA	NA	NA	NA	NA	NA	NA	NA	NA	NA	NA	NA	N
CM.P1B10.NRW	HS_P1_B10	CM1631	1631	2018-02-10	Belize	Orange Walk District	-88.6	18.1	New River Watershed	NRW	New River	Orange Walk North	28.8	26.2	0	7.98	CM	A	F	27.6	18.1	12	10.5	7.7	10.7	5	185	92.4	41.2	15.8	NA	1	Healthy	Around snout sloughing off	Good	Fair, clear, not brittle	Good	NA	NA	NA	NA	NA	NA	NA	2 leeches right hind leg	NA
CM.P1B3.NRW	HS_P1_B3	CM1612	1612	15/07/2018	Belize	Orange Walk District	-88.7	17.7	New River Watershed	NRW	Hillbank	Irish Creek	27.7	26	0	7.46	CM	SA	F	15.5	9.7	7.2	5.5	4.1	NA	NA	112.5	53.7	22.5	9.8	4.5	1	NA	NA	NA	NA	NA	NA	NA	NA	NA	NA	NA	NA	NA	NA
CM.P1B9.NSLW	HS_P1_B9	CM1322	1322	2018-12-08	Belize	Belize District	-88.3	17.3	N/S Lagoon Watershed	NSLW	Gales Point	Southern Lagoon	29.4	27.6	4	NA	CM	J	M	10.7	6.3	4.9	4	2.1	NA	NA	66	33.1	5.9	12.1	0.5	1	NA	NA	NA	NA	NA	NA	NA	NA	NA	NA	NA	NA	NA	Missing left front leg
CM.P1C1.NRW	HS_P1_C1	CM-11	11 single	27/11/2018	Belize	Orange Walk District	-88.6	18.1	New River Watershed	NRW	New River	Orange Walk South	26.9	24.6	0	8.2	CM	H	NA	5.5	2.7	3.2	2.1	1.6	NA	NA	35.1	16.5	5.4	3	NA	0	Thin	Good	Thin	Good	Good	NA	NA	NA	NA	NA	NA	NA	NA	NA
CM.P1C10.NRW	HS_P1_C10	CM1632	1632	2018-02-10	Belize	Orange Walk District	-88.6	18.1	New River Watershed	NRW	New River	Orange Walk North	28.9	24.2	0	7.98	CM	SA	F	21.9	14	8.7	7.7	5.6	5.9	3	147.5	73	28	12	NA	1	Medium	White around nostrils and eyes, skin sloughing off tail, nuchal scutes, mainly dorsal	Skinny	Clear, not brittle, grey	Scapula visible, slight curve in spine	NA	NA	NA	NA	NA	NA	NA	NA	NA
CM.P1C9.NSLW	HS_P1_C9	CM1323	1323	14/08/2018	Belize	Belize District	-88.4	17.2	N/S Lagoon Watershed	NSLW	Gales Point	Matee River Main Creek	27.6	26.9	6	NA	CM	J	M	8.1	4.3	3.7	2.6	1.7	NA	NA	51.4	24.1	8.8	4.3	0.45	0	NA	NA	NA	NA	NA	NA	NA	NA	NA	NA	NA	NA	Fused first double row of scutes. Marked normally counting up from the fused row.	N
CM.P1D1.NRW	HS_P1_D1	CM_D	Mor_D_BZ	31/03/2013	Belize	Belize District	-88.3	17.6	Belize River Watershed	BRW	Ladyville	Crocland	NA	NA	0	NA	CM	A	M	24	15.8	NA	NA	NA	NA	NA	175	84.6	NA	NA	NA	0	NA	NA	NA	NA	NA	NA	NA	NA	NA	NA	NA	NA	NA	NA
CM.P1D10.NRW	HS_P1_D10	CM1633	1633	2018-02-10	Belize	Orange Walk District	-88.6	18.1	New River Watershed	NRW	New River	Orange Walk North	28.9	25.3	0	7.82	CM	SA	F	19.5	11.7	8.6	6.8	5.2	4	3.5	122.7	61.7	25.1	10.9	NA	0	Healthy	Good	Good	Clear	Slight shoulder prominence	NA	NA	NA	NA	NA	NA	NA	NA	Break in tail.
CM.P1D3.NRW	HS_P1_D3	CM1614	1614	27/11/2018	Belize	Orange Walk District	-88.6	18.1	New River Watershed	NRW	New River	Orange Walk South	27.8	24.5	0	8.4	CM	J	M	9.5	6	4.5	3.2	2.3	NA	NA	58.7	27.5	10.4	5.6	0.4	1	Good	Good w/ algae	Good	Grey/clear	Good	NA	NA	NA	NA	NA	NA	NA	NA	NA
CM.P1D9.NRW	HS_P1_D9	CM1616B	1616	2019-09-05	Belize	Orange Walk District	-88.6	17.9	New River Watershed	NRW	New River	Fireburn - Orange Walk Town	29.9	27.8	0	NA	CM	A	M	26	17	9.3	8.1	5.8	8	3.8	180	89.8	30.5	13.3	NA	1	Good	Great	Good	Glassy/strong	Great	Y	M	M	NA	15	18	18	Para on neck and belly	NA
CM.P1E10.NRW	HS_P1_E10	CM1634	1634	2018-02-10	Belize	Orange Walk District	-88.6	18.1	New River Watershed	NRW	New River	Orange Walk North	28.9	25.3	0	7.82	CM	A	F	23.4	16.6	9.3	8.7	6	6.5	3.1	161.6	78.9	34.5	11.3	NA	0	Good	Good	Good	Large clear, glassy, some white	Good, prominent scapula	NA	NA	NA	NA	NA	NA	NA	2 leeches left hind foot, prominent 5th max tooth bumps, large false nostrils	NA
CM.P1F10.NRW	HS_P1_F10	CM1635	1635	2018-02-10	Belize	Orange Walk District	-88.6	18.1	New River Watershed	NRW	New River	Orange Walk North	28.9	25.3	0	7.82	CM	J	F	8.7	4.9	1	3	1.6	2	1.9	60	28.2	10	4.3	NA	0	Good	Good	Good	glassy clear	Good	NA	NA	NA	NA	NA	NA	NA	NA	NA
CM.P1G10.NRW	HS_P1_G10	CM-HATCH3	11(3)	2018-02-10	Belize	Orange Walk District	-88.6	18.1	New River Watershed	NRW	New River	Orange Walk North	28.9	25.3	0	7.82	CM	H	F	4.1	2	2	1.7	0.9	NA	NA	29	14.6	5.9	2.6	NA	0	Skinny	Good	Poor, skinny	Glassy	Good	NA	NA	NA	NA	NA	NA	NA	NA	NA
CM.P1H10.NRW	HS_P1_H10	CM-HATCH1	11 single	27/11/2018	Belize	Orange Walk District	-88.6	18.1	New River Watershed	NRW	New River	Orange Walk South	27.8	24.5	0	8.2	CM	H	NA	5.2	2.3	3.1	2.2	1.4	NA	NA	30.3	14.4	4.8	2.8	NA	0	Skinny	Good	Thin	Glassy grey	Good	NA	NA	NA	NA	NA	NA	NA	NA	NA
CM.P1H9.NRW	HS_P1_H9	CM1621	1621	2019-09-05	Belize	Orange Walk District	-88.6	18.1	New River Watershed	NRW	New River	Fireburn - Orange Walk Town	28.9	26.6	0	NA	CM	J	NA	9.5	5.5	3.8	2.8	2	NA	NA	64.5	30.6	11.6	5.1	0.64	1	Fair	Good, blue tint, algae	Fair	Fair	Good	Y	M	M	NA	15	18	20	Para on belly	NA
CM.P2A10.NRW	HS_P2_A10	CM801	801	30/03/2014	Belize	Belize District	-88.3	17.6	Belize River Watershed	BRW	Ladyville	Ladyville	NA	NA	0	NA	CM	A	M	29.5	19.8	NA	NA	NA	NA	NA	234.9	111.2	NA	NA	NA	0	NA	NA	NA	NA	NA	NA	NA	NA	NA	NA	NA	NA	NA	NA
CM.P2A11.CB	HS_P2_A11	CM15B-GPS130	15	31/08/2019	Belize	Stann Creek District	-88.3	16.8	Cockscomb Basin	CB	Sittee River	Lily Pond to Curry Bar	31.9	25.8	4	NA	CM	H	NA	4.4	NA	2.9	1.3	0.9	1.4	0.8	28.9	14.1	5.3	2.8	0.113398	0	G	EXCELLENT	EXCELLENT	EXCELLENT	EXCELLENT	Y	M	A	NA	16	18	18	NA	NA
CM.P2A12.NRW	HS_P2_A12	CM1081	1081	14/01/2020	Belize	Orange Walk District	-88.5	18.1	New River Watershed	NRW	New River	San Estevan - OW north by-pass bridge	27.1	24	0	NA	CM	J	F	12.3	7.4	4.8	3.8	2.4	4.1	1.6	82	38.5	15.6	7.3	1.24	1	Excellent	Good	Excellent	Good	Excellent	Y	A	A/M	NA	16	18	20	Exterl parasites and skin is falling off.; MC: 981020023307342-981-1	NA
CM.P2B10.NRW	HS_P2_B10	CM802	802	30/03/2014	Belize	Belize District	-88.3	17.6	Belize River Watershed	BRW	Ladyville	Ladyville	NA	NA	0	NA	CM	A	F	31	21	NA	NA	NA	NA	NA	241.4	115.9	NA	NA	NA	0	NA	NA	NA	NA	NA	NA	NA	NA	NA	NA	NA	NA	NA	NA
CM.P2B12.NRW	HS_P2_B12	CM1082	1082	23/01/2020	Belize	Orange Walk District	-88.6	18	New River Watershed	NRW	New River	Shipyard - Orange Walk Town	25.4	20.4	3	8.4	CM	J	NA	10.5	6.1	4.9	3.3	2.1	3.5	2	69.2	33.8	13.2	5.4	NA	1	excellent	Good	Good	Excellent	Excellent	Y	M	M	NA	16	17	21	NA	N
CM.P2C10.NRW	HS_P2_C10	CM_7A	Mor_A_BZ	31/03/2013	Belize	Belize District	-88.3	17.6	Belize River Watershed	BRW	Ladyville	Ladyville	NA	NA	0	NA	CM	A	M	19.5	30.6	NA	NA	NA	NA	NA	205.5	100	NA	NA	NA	0	NA	NA	NA	NA	NA	NA	NA	NA	NA	NA	NA	NA	Wild caught in shrimp farm; OAO2093963	healthy
CM.P2C12.NRW	HS_P2_C12	CM1083	1083	24/01/2020	Belize	Orange Walk District	-88.5	18.2	New River Watershed	NRW	New River	Caledonia - Orange Walk Town	26.4	23.8	3	8.6	CM	J	NA	9.6	5.5	4.6	3	2.1	3.2	2	60.2	29.5	11.9	5.4	0.5	1	Good	Good	Good	Excellent	Excellent	Y	A	M	NA	16	17	20	NA	NA
CM.P2C6.NRW	HS_P2_C6	CM-12/13A	12/13 Single Row	2019-09-05	Belize	Orange Walk District	-88.6	17.9	New River Watershed	NRW	New River	Fireburn - Orange Walk Town	30	27.7	0	NA	CM	H	NA	7	4	2.9	2	1.4	NA	NA	45.6	22.3	7.8	4	0.22	0	Great	Good	Great	Good	Great	Y	M	M	NA	15	18	21	NA	NA
CM.P2D10.NRW	HS_P2_D10	CM_3B	Mor_B_BZ	31/03/2013	Belize	Belize District	-88.3	17.6	Belize River Watershed	BRW	Ladyville	Crocland	NA	NA	0	NA	CM	A	M	24.2	15.8	NA	NA	NA	NA	NA	172	80.3	NA	NA	NA	0	NA	NA	NA	NA	NA	NA	NA	NA	NA	NA	NA	NA	Crocland rescue; tag: 0A01550419	healthy
CM.P2D12.NRW	HS_P2_D12	CM1084	1084	24/01/2020	Belize	Orange Walk District	-88.5	18.2	New River Watershed	NRW	New River	Caledonia - Orange Walk Town	26.2	23.3	1	8.3	CM	J	NA	10	5.6	4.7	2.9	1.9	3.1	1.8	62.8	30	10.7	5.9	0.46	1	Good	Excellent	Good	Excellent	Excellent	Y	M	M	NA	16	18	19	NA	NA
CM.P2D6.NA	HS_P2_D6	CMWW	NA	16/04/2019	Belize	NA	NA	NA	NA	NA	NA	NA	NA	NA	0	NA	CM	A	M	39.9	25.4	15.9	14.4	10	13	4.5	271	128	56.4	23	63.5	0	Fair	peeling, on tail-whitish peeling	weak, some muscle loss on limbs	grayish, trnasparent, lost teeth in premax	strong	Y	M	A	NA	M	M(17)	M(21)	VENTRAL TAIL: M (5);	emaciated, scapula and spine showing bulging abdomen, lethargic semi-struggled, skin peeling<c9>died
CM.P2E10.NRW	HS_P2_E10	CM_2C	Mor_C_BZ	31/03/2013	Belize	Belize District	-88.3	17.6	Belize River Watershed	BRW	Ladyville	Crocland	NA	NA	0	NA	CM	A	M	15.5	24	NA	NA	NA	NA	NA	174	88	NA	NA	NA	0	NA	NA	NA	NA	NA	NA	NA	NA	NA	NA	NA	NA	Crocland rescue; tag: 0A01556914	healthy
CM.P2E12.NRW	HS_P2_E12	CM1085	1085	24/01/2020	Belize	Orange Walk District	-88.5	18.1	New River Watershed	NRW	New River	Caledonia - Orange Walk Town	25.9	22	2	8.2	CM	A	M	24.7	16.1	10.7	7.5	5.5	9	5.6	161	81.3	33.6	13.9	27	1	Good	Good	Fair	Excellent	Good	Y	M	M	NA	16	17	20	NA	NA
CM.P2F10.NRW	HS_P2_F10	CM_6E	Mor_E_BZ	31/03/2013	Belize	Belize District	-88.3	17.6	Belize River Watershed	BRW	Ladyville	Crocland	NA	NA	0	NA	CM	A	F	24.5	16	NA	NA	NA	NA	NA	172	85.5	NA	NA	NA	0	NA	NA	NA	NA	NA	NA	NA	NA	NA	NA	NA	NA	Nuisance croc eating shrimp captured by ACES (listed as CA); MC: 0A01731772	healthy
CM.P2F11.CB	HS_P2_F11	CMOSHA	1047	25/07/2019	Belize	Stann Creek District	-88.5	16.5	Cockscomb Basin	CB	Placencia Lagoon	Flower Camp	29	29.3	10	NA	CM	SA	F	16.7	10	5.8	4.8	3.8	7	2.6	111.5	52.9	21.4	7.5	NA	0	Excellent	NA	NA	NA	NA	NA	NA	NA	NA	NA	NA	NA	Photos previously taken, realeased rehab crocs; Osha	NA
CM.P2G12.NRW	HS_P2_G12	CM1087	1087	28/02/2020	Belize	Orange Walk District	-88.5	18.2	New River Watershed	NRW	New River	San Estevan - OW north by-pass bridge	27.8	23	2	8.7	CM	J	NA	13.5	8.1	6.1	4.4	2.8	3.7	2.7	92	43	16.6	7.8	1.8	1	good	Good	Good	Good	Good	Y	M	M	NA	16	17	21	NA	NA
CM.P2G6.NRW	HS_P2_G6	CMGPS1756HH	12/13 Single Row	2019-09-05	Belize	Orange Walk District	-88.5	18	New River Watershed	NRW	New River	Fireburn - Orange Walk Town	40	26.1	0	NA	CM	H	NA	6.5	3.4	2.7	2.2	1.5	NA	NA	37.8	19.5	5.7	3.5	0.1	0	Fair	Fair	Fair	Good	Good	Y	M	A/M	NA	15	17	20	NA	NA
CM.P2G9.NRW	HS_P2_G9	CM-12/13B	12/13 Single Row	2019-09-05	Belize	Orange Walk District	-88.6	18	New River Watershed	NRW	New River	Fireburn - Orange Walk Town	31.3	27.3	0	NA	CM	H	NA	6.4	3.6	2.5	2	1.3	NA	NA	39.1	18.9	6	3.4	0.12	0	Fair	Good, algae, some blue tint	Fair	Good	Good	Y	M	M	NA	15	17	20	NA	NA
CM.P2H11.NRW	HS_P2_H11	CM1080	1080	14/01/2020	Belize	Orange Walk District	-88.5	18.1	New River Watershed	NRW	New River	San Estevan - OW north by-pass bridge	NA	24.7	0	NA	CM	A	F	29.8	16.5	10.3	8.9	5.6	8	5.4	176	85.5	37.6	16.5	NA	0	GOOD	Poor	GOOD	Good	Excellent	Y	A	M	NA	16	17	18	Fully black; some white spots. Breeding pair; 7ft male seen nearby; MC: 981020023457739-981-6	NA
CM.P2H12.NRW	HS_P2_H12	CM1088	1088	28/02/2020	Belize	Orange Walk District	-88.5	18.2	New River Watershed	NRW	New River	San Estevan - OW north by-pass bridge	27.6	23.8	3	8.6	CM	SA	M	20	13	9	6.5	4.7	7.8	4.4	139	67.3	30.5	11	24	1	excellent	Good	Excellent	Good	Good	Y	M	M	NA	16	18	19	NA	NA
CM.P2H9.NRW	HS_P2_H9	CM800	800	30/03/2014	Belize	Belize District	-88.3	17.6	Belize River Watershed	BRW	Ladyville	Ladyville	NA	NA	0	NA	CM	A	M	23.9	14.8	NA	NA	NA	NA	NA	179.3	85	NA	NA	NA	1	NA	NA	NA	NA	NA	NA	NA	NA	NA	NA	NA	NA	Leviatan	NA
CM.P3A1.NRW	HS_P3_A1	CM1089	1089	28/02/2020	Belize	Orange Walk District	-88.5	18.2	New River Watershed	NRW	New River	San Estevan - OW north by-pass bridge	27.6	22.9	3	8.2	CM	J	NA	10.7	6.1	5	3.4	2.5	2.5	2.8	72.7	34.3	13	6	0.76	1	Good	Good	Fair	Fair	Good	Y	M	M	NA	16	17	20	NA	NA
CM.P3A3.NRW	HS_P3_A3	CM9/10A	2024-09-10	28/02/2020	Belize	Orange Walk District	-88.5	18.1	New River Watershed	NRW	New River	San Estevan - OW north by-pass bridge	27.5	20.4	2	8.2	CM	H	NA	6.2	3	3.4	2	1.3	NA	1.1	39.2	18.7	6.5	3.1	0.12	1	fair	Excellent	Good	good	Good	Y	M	M	NA	16	17	21	NA	NA
CM.P3A4.NRW	HS_P3_A4	CM12/15B	12/15B	29/02/2020	Belize	Orange Walk District	-88.6	18.1	New River Watershed	NRW	New River	North bypass Bridge - South Bypass bridge	27.2	24.5	3	8	CM	H	M	6	3	2.3	1.7	1.1	1.8	1.9	39.4	19.4	6.1	3.3	0.12	0	good	Good	Fair	GOOD	Excellent	Y	M	M	NA	16	18	19	NA	NA
CM.P3A6.CF	HS_P3_A6	CM1040	1040	2017-03-01	Belize	Cayo District	-88.9	16.9	Chiquibul Forest	CF	Chiquibul	Upper Macal	25.5	21.3	5	7.2	CM	A	F	27.6	17.8	NA	NA	11	9.9	6.5	184.8	84.5	41.2	15.7	NA	1	NA	NA	NA	NA	NA	NA	NA	NA	NA	NA	NA	NA	NA	NA
CM.P3A7.CB	HS_P3_A7	CM1192	1192	2020-12-12	Belize	Stann Creek District	-88.3	16.8	Cockscomb Basin	CB	Sittee River	Sittee River	NA	NA	0	NA	CM	J	F	14.6	8.9	5.8	5	3.1	4.1	2.8	98	49.2	19.7	8.6	2.53	1	GOOD	POOR	GOOD	GOOD	GOOD	Y	NA	M	NA	16	17	16	"Billy White" croc	Nubbed claws
CM.P3A8.CB	HS_P3_A8	CM_15B	15	31/08/2019	Belize	Stann Creek District	-88.3	16.8	Cockscomb Basin	CB	Sittee River	Lily Pond to Curry Bar	31.9	25.8	4	8.8	CM	H	NA	4.4	1.8	1.9	1.7	1	1.2	0.8	29.5	13.9	5	2.1	0.113398	0	GOOD	EXCELLENT	EXCELLENT	EXCELLENT	EXCELLENT	Y	M	A	NA	16	17	19	NA	NA
CM.P3B1.NRW	HS_P3_B1	CM1090	1090	28/02/2020	Belize	Orange Walk District	-88.5	18.1	New River Watershed	NRW	New River	San Estevan - OW north by-pass bridge	27.6	22.3	2	8.3	CM	J	NA	10.7	6.2	5.1	3.4	2	2.8	2.3	70.5	33.7	12.5	6	0.72	1	Good	Blue tint	Fair	Good	Good	Y	M	M	NA	16	17	20	NA	NA
CM.P3B3.NRW	HS_P3_B3	CM-11/12A	2024-11-12	28/02/2020	Belize	Orange Walk District	-88.5	18.1	New River Watershed	NRW	New River	San Estevan - OW north by-pass bridge	27.6	22.5	3	8.3	CM	J	NA	10.8	6.3	4.8	3.3	2.4	2.8	2	69.9	34.9	12.5	5.8	0.74	1	Good	Blue tint	Fair	Fair	Good	Y	M	M	NA	16	17	20	NA	NA
CM.P3B6.NRW	HS_P3_B6	CM1324	1324	22/11/2019	Belize	Orange Walk District	-88.6	18	New River Watershed	NRW	New River	Guinne Grass	NA	NA	0	NA	CM	SA	F	20.9	30.2	7.9	6.8	4.6	9.9	4.4	143	72	30	13	NA	0	GOOD	GOOD	GOOD	Good	GOOD	Y	M	M	NA	15	17	19	Captured from OW savanh and relocated to New River; 981020023291735-981-5, battery died	NA
CM.P3C1.NRW	HS_P3_C1	CM1091	1091	28/02/2020	Belize	Orange Walk District	-88.5	18.1	New River Watershed	NRW	New River	San Estevan - OW north by-pass bridge	28.4	19	3	8.3	CM	SA	M	21.2	13.7	9	6.9	4.9	8.5	4.1	136	67.5	28.7	12.2	23	1	Good	Good	Good	good	Good	Y	M	M	NA	16	18	17	NA	NA
CM.P3C3.NRW	HS_P3_C3	CM-11/12B	2024-11-12	23/01/2020	Belize	Orange Walk District	-88.6	18	New River Watershed	NRW	New River	Shipyard - Orange Walk Town	25	21.5	0	8.4	CM	H	NA	5.9	2.8	3.1	1.8	1.3	2.8	0.7	38.6	18.6	6.7	3.5	NA	0	Excellent	Good	Excellent	Excellent	Excellent	Y	M	M	NA	16	17	19	NA	N
CM.P3C6.NRW	HS_P3_C6	CM1643	1643	2020-10-07	Belize	Orange Walk District	-88.6	18	New River Watershed	NRW	New River	BSI - Drainage Tank	NA	NA	0	NA	CM	SA	M	18.9	12.1	7	5.2	3.8	8	3.4	128	64.1	25	11.1	5.32	0	Excellent	Fair	Good	Excellent	Good	Y	NA	M	M	16	17	20	BSI request on removing crocs in polluted tank. (Name: Pigpen)	No wounds. Whitish skin (Tail & limbs)
CM.P3C7.CB	HS_P3_C7	CM1189	1189	27/11/2020	Belize	Stann Creek District	-88.3	16.8	Cockscomb Basin	CB	Sittee River	Sittee RIver Downstream	24.9	24.8	2	NA	CM	J	F	11.7	7	4.8	3.8	2.4	3.5	2.6	77.5	38.1	15.3	6.2	1.1	1	GOOD	Good	EXCELLENT	EXCELLENT	EXCELLENT	Y	NA	M	M	16	18	17	NA	NA
CM.P3C8.CB	HS_P3_C8	CM1186-TORNILLA	1186	26/11/2020	Belize	Stann Creek District	-88.4	16.6	Cockscomb Basin	CB	Placencia Lagoon	Amik Kil Ha	NA	NA	0	NA	CM	SA	F	15.3	9.1	5.9	4.4	3.3	4.6	2.9	101.4	46.8	20	9.3	3.07	0	Good	Fair	Good	Fair	Good	NA	NA	M	M	16	18	18	Gotten from bze city. rehabbed at BWRC for 4 months then released by CRC; Name: Tornilla	NA
CM.P3D1.NRW	HS_P3_D1	CM1092	1092	29/02/2020	Belize	Orange Walk District	-88.5	18.1	New River Watershed	NRW	New River	North bypass Bridge - South Bypass bridge	27.4	24	2	8.7	CM	J	F	11.4	6.7	4.4	3.3	2.3	3.3	1.9	74	35	13.5	7	0.9	1	good	fair - Flaky skin	Good	FAIR	Excellent	Y	M	M	NA	16	18	19	981020023308850-981	NA
CM.P3D3.NRW	HS_P3_D3	CM-11/13	2024-11-13	29/02/2020	Belize	Orange Walk District	-88.6	18.1	New River Watershed	NRW	New River	North bypass Bridge - South Bypass bridge	27.2	24.5	3	8	CM	H	M	6.1	3.1	2.4	1.9	1.3	1.8	1.4	38.4	18.6	6.1	3.4	0.1	0	excellent	good	Good	GOOD	Excellent	Y	A	M	NA	16	17	20	NA	NA
CM.P3D6.RHW	HS_P3_D6	CM1096	1096	2020-06-05	Belize	Orange Walk District	-88.6	18.2	Rio Hondo Watershed	RHW	Rio Hondo	Douglas Village, Orange Walk	NA	NA	0	NA	CM	A	M	24	15.8	11.2	9.1	6.3	8.5	5.6	173	86.8	35.4	15	NA	0	GOOD	GOOD	GOOD	FAIR - GLASSY	GOOD	Y	NA	M	NA	16	17	20	Captured in Orange Walk Town and translocated to douglas rio hondo	Healed puncture on abdomen
CM.P3D7.CB	HS_P3_D7	CM1190	1190	27/11/2020	Belize	Stann Creek District	-88.3	16.8	Cockscomb Basin	CB	Sittee River	Sittee RIver Downstream	24.9	24.1	2	NA	CM	J	F	10.9	6.3	4.5	3.3	2.3	3	2.5	72	36.4	15	5.6	1.02	1	GOOD	Excellent	EXCELLENT	EXCELLENT	EXCELLENT	Y	M	M	M	16	17	21	NA	NA
CM.P3E3.NRW	HS_P3_E3	CM12/14A	12/14A	29/02/2020	Belize	Orange Walk District	-88.6	18.1	New River Watershed	NRW	New River	North bypass Bridge - South Bypass bridge	27	23.4	2	8.2	CM	J	M	8.9	5.1	3.6	2.7	1.8	2.9	1.7	61.6	29.4	10.3	5.4	0.48	1	good	Excellent	Fair	FAIR	Good	Y	M	M	NA	16	18	20	NA	NA
CM.P3E6.NA	HS_P3_E6	CM_GPS147_Hatch	NA	2019-02-09	Belize	NA	NA	NA	NA	NA	NA	NA	NA	NA	NA	NA	CM	H	NA	NA	NA	NA	NA	NA	NA	NA	NA	NA	NA	NA	NA	NA	NA	NA	NA	NA	NA	NA	NA	NA	NA	NA	NA	NA	NA	NA
CM.P3E7.CB	HS_P3_E7	CM1193	1193	2021-02-10	Belize	Stann Creek District	-88.3	16.8	Cockscomb Basin	CB	Sittee River	Reserve Start	27.1	25.9	3	NA	CM	J	M	12	7	4.5	3.7	2.7	3	2.2	77	37.7	14.6	6.8	1.1	0	good	NA	fair	good	excellent	Y	NA	M	NA	16	17	19	MICROCHIP: 981020023292805-981	NA
CM.P3F1.RHW	HS_P3_F1	CM1095	1095	27/03/2020	Belize	Orange Walk District	-88.6	18.2	Rio Hondo Watershed	RHW	Rio Hondo	San Roman	NA	NA	0	NA	CM	J	M	9.8	5.6	4.8	3.1	2	3.3	2.3	64.5	30.8	10.6	5.4	0.5	1	good	Fair	Good	Fair	Good	Y	M	M	NA	16	17	20	Captured in Ow town, relocated in Rio Hondo San roman	NA
CM.P3F2.NA	HS_P3_F2	CM2919B	NA	2019-02-09	Belize	NA	NA	NA	NA	NA	NA	NA	NA	NA	NA	NA	CM	NA	NA	NA	NA	NA	NA	NA	NA	NA	NA	NA	NA	NA	NA	NA	NA	NA	NA	NA	NA	NA	NA	NA	NA	NA	NA	NA	NA	NA
CM.P3F3.NRW	HS_P3_F3	CM12/14B	12/14B	29/02/2020	Belize	Orange Walk District	-88.6	18.1	New River Watershed	NRW	New River	North bypass Bridge - South Bypass bridge	27	23.3	2	8	CM	J	M	8.9	4.9	3.8	2.8	2	2.5	1.6	56.2	28	10.3	5.3	0.4	1	excellent	Excellent	Good	GOOD	Excellent	Y	M	M	NA	16	18	17	NA	NA
CM.P3F6.NTW	HS_P3_F6	CM-#8GREG	8-Greg	20/08/2020	Belize	Toledo District	-88.4	16.6	Northern Toledo Watershed	NTW	Sennis River	NEar mouth	NA	NA	2	NA	CM	SA	M	19.8	12.8	8.8	6.8	4.6	6	5	146	70	33.6	13.5	NA	1	Excellent	EXCELLENT	EXCELLENT	Good	EXCELLENT	Y	NA	Y	Y	16	18	20	Caught by BWRC in Santa Familia, Cayo and brought down to Sennis River	NA
CM.P3F7.CB	HS_P3_F7	CM1194	1194	2021-02-10	Belize	Stann Creek District	-88.3	16.8	Cockscomb Basin	CB	Sittee River	Reserve Start	27.2	24.6	4	NA	CM	J	M	10.2	5.6	4	3	2.1	5.6	1.6	65.4	32.1	12	5.6	6.2	0	good	NA	fair	good	excellent	Y	NA	M	NA	16	18	18	NA	NA
CM.P3F8.CB	HS_P3_F8	CM-HATCH-13-77	HATCH. 13A	27/11/2020	Belize	Stann Creek District	-88.3	16.8	Cockscomb Basin	CB	Sittee River	Sittee RIver Downstream	24.6	24.6	1	NA	CM	H	M	6	3.1	2.2	1.8	1.3	NA	NA	39.5	18.7	7.5	3.4	0.145	0	GOOD	Excellent	EXCELLENT	EXCELLENT	EXCELLENT	Y	M	M	M	16	18	20	NA	NA
CM.P3G2.CB	HS_P3_G2	CM-H16	H 16	28/01/2021	Belize	Stann Creek District	-88.4	16.7	Cockscomb Basin	CB	Placencia Lagoon	BAL, Effluent Ponds	26.4	25	3	NA	CM	H	M	7.4	3.9	3	1.9	1.6	1.5	1.9	44.7	22.2	7.9	3.7	0.205	0	good	excellent	good	good	good	NA	NA	M	M	16	18	19	NA	NA
CM.P3G3.NRW	HS_P3_G3	CM12/14C	12/14C	29/02/2020	Belize	Orange Walk District	-88.6	18.1	New River Watershed	NRW	New River	North bypass Bridge - South Bypass bridge	27.2	24.5	3	8	CM	H	F	6.2	3.2	2.5	1.7	1.2	2.2	1.4	41	20	6.8	3.4	0.14	0	excellent	Good - injury in chest	Excellent	GOOD	Excellent	Y	M	M	NA	16	17	20	NA	NA
CM.P3G4.NRW	HS_P3_G4	CM-H10/9	H10/9	23/01/2020	Belize	Orange Walk District	-88.5	18	New River Watershed	NRW	New River	Shipyard - Orange Walk Town	26.3	21.5	3	8.2	CM	J	NA	9.7	5.4	4.2	2.6	1.8	2.7	1.7	54.8	26.2	9.8	4.9	NA	1	Fair	fair	Fair	Excellent	Good	Y	A	M	NA	16	18	20	NA	N
CM.P3G6.CB	HS_P3_G6	CM1187	1187	27/11/2020	Belize	Stann Creek District	-88.3	16.8	Cockscomb Basin	CB	Sittee River	Sittee RIver Downstream	24.9	24.8	1	NA	CM	H	M	6.8	3.5	2.4	1.9	1.4	1.5	1.4	45	22.6	8.8	3.7	0.6	0	Excellent	Excellent	EXCELLENT	Good	EXCELLENT	Y	NA	M	NA	16	18	19	NA	NA
CM.P3G7.CB	HS_P3_G7	CM1195	1195	2021-03-10	Belize	Stann Creek District	-88.3	16.8	Cockscomb Basin	CB	Sittee River	Reserve Start	27.1	24.7	3	NA	CM	A	F	28.4	18.4	13.1	11.5	7.5	18.4	6.2	212.5	104.2	52.5	19	NA	1	excellent	NA	excellent	excellent	excellent	Y	NA	M	NA	16	18	19	MICROCHIP:981020023448172-981; SATELLITE TRACKER	NA
CM.P3G8.CB	HS_P3_G8	CM-HATCH78	Hatchling 13B	27/11/2020	Belize	Stann Creek District	-88.3	16.8	Cockscomb Basin	CB	Sittee River	Sittee RIver Downstream	24.6	24.6	1	NA	CM	H	M	5.5	2.5	2.4	1.9	1.4	NA	NA	34.7	16.8	6.1	3.1	0.095	0	GOOD	Good	GOOD	Good	Good	Y	M	M	M	16	18	17	NA	NA
CM.P3H2.NRW	HS_P3_H2	CM12/11	2024-12-11	23/09/2019	Belize	Orange Walk District	-88.6	17.9	New River Watershed	NRW	New River	Shipyard-Maracas	32.1	27.4	1	9.1	CM	H	NA	5	2.1	2.3	1.7	1.2	1.3	0.8	31.5	15.3	5.1	3.9	0.06	0	NA	Excellent	Good	Excellent	Excellent	N	M	A	NA	16	16	21	little skinny	NA
CM.P3H3.NRW	HS_P3_H3	CM12/15A	12/15A	29/02/2020	Belize	Orange Walk District	-88.6	18.1	New River Watershed	NRW	New River	North bypass Bridge - South Bypass bridge	27.2	22.5	2	8	CM	J	M	8.5	5	3.4	2.6	1.7	2.9	1.6	54.2	26	9	4.9	0.36	1	excellent	Excellent	Excellent	GOOD	Excellent	Y	A	M	NA	16	18	20	NA	NA
CM.P4B2.NA	HS_P4_B2	CM1175	1175	29/03/2018	Belize	NA	NA	NA	NA	NA	NA	NA	NA	NA	NA	NA	CM	NA	NA	NA	NA	NA	NA	NA	NA	NA	NA	NA	NA	NA	NA	NA	NA	NA	NA	NA	NA	NA	NA	NA	NA	NA	NA	NA	NA	NA
CM.P4D1.NSLW	HS_P4_D1	CM-Hatch	11	2018-11-08	Belize	Belize District	-88.3	17.3	N/S Lagoon Watershed	NSLW	Southern Lagoon	Eastern	30	28.5	0	NA	CM	H	NA	5.4	3.2	3.2	1.8	1.2	NA	NA	33.1	16.6	NA	NA	NA	0	NA	NA	NA	NA	NA	NA	NA	NA	NA	NA	NA	NA	NA	N
CM.P4E1.CB	HS_P4_E1	CM1179	1179	2018-03-07	Belize	Stann Creek District	-88.3	16.8	Cockscomb Basin	CB	Sitee River	Sitee River	30.2	28.2	0	7.03	CM	H	M	7.1	4.1	3.6	2.3	1.8	NA	NA	42.8	20.8	7.2	4.4	<0.5	0	NA	NA	NA	NA	NA	NA	NA	NA	NA	NA	NA	NA	Too small for blood	N
CM.P4F1.CB	HS_P4_F1	CM1181	1181	2018-03-07	Belize	Stann Creek District	-88.3	16.8	Cockscomb Basin	CB	Sitee River	Sitee River	28.9	27.2	0	6.94	CM	J	M	12.9	7.4	5.7	4.2	2.9	6.2	2.2	82.9	39.7	15.9	8.1	3.6	0	NA	NA	NA	NA	NA	NA	NA	NA	NA	NA	NA	NA	NA	N
CM.P4G1.CB	HS_P4_G1	CM1182	1182	2018-03-07	Belize	Stann Creek District	-88.3	16.8	Cockscomb Basin	CB	Sitee River	Sitee River	30.2	25	0	6.95	CM	J	M	9.5	5.5	4.6	3.3	2.9	4.2	1.8	62.4	28.9	10	5.4	0.9	0	NA	NA	NA	NA	NA	NA	NA	NA	NA	NA	NA	NA	Vocalized and larger croc 20m away called back	N
CM.P4H2.NRW	HS_P4_H2	CM1610	1610	2018-12-07	Belize	Orange Walk District	-88.7	17.6	New River Watershed	NRW	Hill Bank	Harry Jones	30.4	26.3	0	7.18	CM	A	M	31.4	21.2	13.5	12.2	8.2	14.6	6.7	223	100.3	45.9	18.8	NA	1	NA	NA	NA	NA	NA	NA	NA	NA	NA	NA	NA	NA	Genetalia pic	Broken bone in abdomen but healed. Scar on right side of tail
CM.PC2.CF	HS_PC_2	CM1041	1041	2017-03-01	Belize	Cayo District	-88.9	16.9	Chiquibul Forest	CF	Chiquibul	Upper Macal	27.6	20.9	5	7.2	CM	A	M	29	19.2	NA	NA	11.2	9.8	6.5	202	91.8	44.5	16.5	NA	1	NA	NA	NA	NA	NA	NA	NA	NA	NA	NA	NA	NA	NA	NA
CM.PC3.CF	HS_PC_3	CM1047	1047	2017-06-09	Belize	Cayo District	-88.9	16.8	Chiquibul Forest	CF	Chiquibul	Raspaculo;Macal Confluence to Camp 16	23.9	23.3	5	9	CM	H	M	NA	NA	NA	NA	NA	NA	NA	48	28	NA	NA	NA	0	NA	NA	NA	NA	NA	NA	NA	NA	NA	NA	NA	NA	NA	NA
CM.PC4.CF	HS_PC_4	CM1049	1049	2017-06-10	Belize	Cayo District	-88.9	16.8	Chiquibul Forest	CF	Chiquibul	Macal;Confluence to GPS	27.2	24	4	9.6	CM	SA	F	19	11.8	NA	NA	8.5	6	4	133.6	65	29.8	11.3	NA	1	NA	NA	NA	NA	NA	NA	NA	NA	NA	NA	NA	NA	NA	NA
CM.PC5.CF	HS_PC_5	CM1050	1050	2017-06-10	Belize	Cayo District	-88.9	16.9	Chiquibul Forest	CF	Chiquibul	Macal;Confluence to GPS	21.7	22	5	8.9	CM	SA	F	16.8	16.2	NA	NA	6.5	5.4	3.7	118.7	59.2	26.3	9.4	NA	1	NA	NA	NA	NA	NA	NA	NA	NA	NA	NA	NA	NA	NA	NA
CM.PC6.NRW	HS_PC_6	CM1611B	1611	2018-12-07	Belize	Orange Walk District	-88.7	17.6	New River Watershed	NRW	Hill Bank	Harry Jones	29.6	23.5	0	7.39	CM	A	M	28	18.3	12.4	10.2	6.8	12.5	3	199.8	93.7	44.5	15.1	NA	1	NA	NA	NA	NA	NA	NA	NA	NA	NA	NA	NA	NA	NA	Scar on tail
CM.PC7.NRW	HS_PC_7	CM1613	1613	15/07/2018	Belize	Orange Walk District	-88.7	17.6	New River Watershed	NRW	Hillbank	Lemol Creek	30.2	26.1	0	7.55	CM	A	M	35.6	22.8	16.2	16.2	8.1	12.2	5.2	257.7	126	57.9	20.5	NA	0	NA	NA	NA	NA	NA	NA	NA	NA	NA	NA	NA	NA	NA	Bite marks on tail and back
CM.PC8.NRW	HS_PC_8	CM1620	1620	2018-12-07	Belize	Orange Walk District	-88.7	17.6	New River Watershed	NRW	Hill Bank	Harry Jones	30.3	26.2	0	7.45	CM	SA	M	27.4	18.2	11.5	10	6.3	12	4.1	140.5	89.5	41.5	15.4	NA	0	NA	NA	NA	NA	NA	NA	NA	NA	NA	NA	NA	NA	NA	Missing all single row of tail
HY.P1A1.NA	HS_P1_A1	CM_RICK	rick	15/10/2017	Belize	NA	NA	NA	NA	NA	NA	NA	NA	NA	0	NA	HY	SA	M	19.9	12.8	8.8	6.9	4.7	9.7	4	126.4	59.1	21.3	10.9	5.4	1	NA	NA	NA	NA	NA	NA	NA	NA	NA	NA	NA	NA	rehab croc; emaciated, curvature in spine pronounced, right nictating membrane cloudy, very feisty, curvature in spine looks like poor husbandry	died
HY.P1A2.NTW	HS_P1_A2	HY924	924	19/06/2018	Belize	Toledo District	-88.6	16.4	Northern Toledo Watershed	NTW	Payne's Creek	Croc Pond	NA	NA	0	NA	HY	SA	F	24	16.5	9.5	9.5	5.5	13	4.5	152	78	38	10.5	16.3	0	NA	NA	NA	NA	NA	NA	NA	NA	NA	NA	NA	NA	Blood glucose syringe: 4.9; clip: 4.3	N
HY.P1A4.CB	HS_P1_A4	HY909	909	20/07/2016	Belize	Stann Creek District	-88.4	16.6	Cockscomb Basin	CB	BAL	Tarpon Bridge	31.7	27.1	15	NA	HY	SA	F	26.3	17.5	6.3	7	3.5	11.2	4	169	83.1	38.5	NA	NA	1	NA	NA	NA	NA	NA	NA	NA	NA	NA	NA	NA	NA	NA	NA
HY.P1A5.CB	HS_P1_A5	HY_11B	11	2016-10-09	Belize	Stann Creek District	-88.4	16.5	Cockscomb Basin	CB	BAL	Molly Manor	28.7	26.4	19	7.5	HY	H	NA	7.1	3.9	3.1	1.9	1.4	NA	NA	44.5	20.4	7.9	NA	NA	0	NA	NA	NA	NA	NA	NA	NA	NA	NA	NA	NA	NA	NA	NA
HY.P1B4.NA	HS_P1_B4	HY913A	913A	15/02/2016	Belize	NA	NA	NA	NA	NA	NA	NA	NA	NA	NA	NA	HY	NA	NA	NA	NA	NA	NA	NA	NA	NA	NA	NA	NA	NA	NA	NA	NA	NA	NA	NA	NA	NA	NA	NA	NA	NA	NA	NA	NA	NA
HY.P1B5.CB	HS_P1_B5	HY-11C	11	20/07/2016	Belize	Stann Creek District	-88.4	16.6	Cockscomb Basin	CB	BAL	Fern Gully Stream	31	27.8	18	NA	HY	J	NA	9.8	5.4	3.2	2.8	1.7	NA	NA	62	30.4	10.4	NA	NA	0	NA	NA	NA	NA	NA	NA	NA	NA	NA	NA	NA	NA	HY	NA
HY.P1C4.CB	HS_P1_C4	HY913B	913	2016-08-05	Belize	Stann Creek District	-88.4	16.6	Cockscomb Basin	CB	BAL	Molly Manor	31	26.2	21	NA	HY	A	F	33.5	22	9.8	3.5	11.5	9.2	6.3	218.5	108.6	NA	55.4	NA	1	NA	NA	NA	NA	NA	NA	NA	NA	NA	NA	NA	NA	NA	NA
HY.P1D4.NA	HS_P1_D4	HY919A	919A	21/06/2017	Belize	NA	NA	NA	NA	NA	NA	NA	NA	NA	NA	NA	HY	NA	NA	NA	NA	NA	NA	NA	NA	NA	NA	NA	NA	NA	NA	NA	NA	NA	NA	NA	NA	NA	NA	NA	NA	NA	NA	NA	NA	NA
HY.P1E4.NRW	HS_P1_E4	HY919B	919	16/04/2018	Belize	Corozal District	-88.4	18.3	New River Watershed	NRW	New River	New River	27.9	21.9	10	8.1	HY	J	NA	12.9	7.8	5.5	5	2.9	5	2.4	83.3	39	16	7	2.7	1	NA	hypermelanistic	NA	NA	NA	Y	NA	NA	NA	NA	NA	NA	Nucchal picture ; tagged as acutus but more morelet; me: James	N
HY.P1F4.CB	HS_P1_F4	HY975	975	19/06/2018	Belize	Stann Creek District	-88.3	16.8	Cockscomb Basin	CB	Sittee River	The Reserve	33.6	27.8	0	NA	HY	SA	F	15.9	9.4	6.6	4.9	3.5	4	3.4	109.5	51.9	23.5	9.8	NA	1	NA	NA	NA	NA	NA	NA	NA	NA	NA	NA	NA	NA	Pictures 100-2543/-2578	N
HY.P1F5.NRW	HS_P1_F5	HY918	918	16/04/2018	Belize	Corozal District	-88.4	18.3	New River Watershed	NRW	New River	New River	28.2	23.5	10	7.7	HY	SA	M	18.5	12	7	6.5	3.8	6	1.8	125	61	23.5	9	8.2	1	NA	hypermelanistic	NA	NA	NA	Y	NA	NA	NA	NA	NA	NA	Nucchal picture ; hypermelanistic ; tagged as acutus but more morelet; Darth Sidious	N
HY.P1F9.NRW	HS_P1_F9	HY1619	1619	2019-09-05	Belize	Orange Walk District	-88.6	18.1	New River Watershed	NRW	New River	Fireburn - Orange Walk Town	29.2	27.4	0	NA	HY	A	M	23.1	15	8.5	7.5	5	7	4	156	74.1	30.5	13.6	5.2	1	Good	Blue tint	Good	Glassy	Good	Y	A	A	NA	15	19	20	NA	NA
HY.P1G3.NRW	HS_P1_G3	HY1617A	1617	2019-09-05	Belize	Orange Walk District	-88.6	18	New River Watershed	NRW	New River	Fireburn - Orange Walk Town	29.7	28.1	0	NA	HY	SA	F	14.4	9.3	6.7	4.8	2.6	4.2	1.7	101.3	51.4	18.8	7.8	2.42	1	Great	Good	Great	Good	Great	Y	A	A	NA	15	18	18	NA	NA
HY.P1G4.CB	HS_P1_G4	HY-RANC-960	960	25/07/2019	Belize	Stann Creek District	-88.5	16.5	Cockscomb Basin	CB	Placencia Lagoon	Flower Camp	29	29.3	10	NA	HY	A	M	30	19.9	11.5	12	7.8	12.5	5.5	208	103.1	49.6	17.9	NA	1	excellent	EXCELLENT	EXCELLENT	EXCELLENT	EXCELLENT	Y	A	A	NA	16	17	20	The released crocs: photos previously taken, previously captured, released rehab crocs; Rancor	N
HY.P1H3.NRW	HS_P1_H3	HY1618a	1618	2019-09-05	Belize	Orange Walk District	-88.6	18	New River Watershed	NRW	New River	Fireburn - Orange Walk Town	30.7	27.4	0	NA	HY	SA	F	18	11.1	6.8	6.6	3.9	4.9	3	121.3	61	23.3	11	4.78	1	Good	Fair, Blue flaky	Fair	Fair/glassy	Great	Y	A	A/M	NA	15	18	22	NA	NA
HY.P1H4.CB	HS_P1_H4	HY-11A	11	2016-10-09	Belize	Stann Creek District	-88.4	16.7	Cockscomb Basin	CB	BAL	Canal	29.2	26.9	18	7.1	HY	H	NA	9.2	5.4	3.5	2.4	2	NA	NA	57.2	28	11.5	NA	NA	0	NA	NA	NA	NA	NA	NA	NA	NA	NA	NA	NA	NA	HY	NA
HY.P2A6.CB	HS_P2_A6	HY1185A	1185	2019-11-07	Belize	Stann Creek District	-88.2	16.9	Cockscomb Basin	CB	Stann Creek Coastline	Sitte River-Dangriga	31.1	28.4	38	8.1	HY	J	NA	10.7	6.4	4.6	3.1	2.8	3.3	2.1	69.1	34.3	11.8	6.2	0.68	0	G	EXCELLENT	EXCELLENT	EXCELLENT	EXCELLENT	Y	A	A	2024-04-02	16	18	20	Mannie; was originally listed as CM	Y
HY.P2B11.CB	HS_P2_B11	HY916	916	2019-08-09	Belize	Stann Creek District	-88.4	16.6	Cockscomb Basin	CB	Placencia lagoon	Silver Creek	30.4	28.4	0	NA	HY	H	NA	5.1	2.5	2.4	1.4	1.1	1.4	0.5	32.6	15.9	5.9	3	0.1	0	GOOD	EXCELLENT	FAIR	EXCELLENT	EXCELLENT	Y	A	A	NA	16	17	18	; POS: 2	Y
HY.P2B6.CB	HS_P2_B6	HY1185B	1185	29/06/2019	Belize	Stann Creek District	-88.3	16.8	Cockscomb Basin	CB	Sitte River	cockscomb basin	28.1	26.2	10	8	HY	J	M	10.8	6.2	4.5	3.4	2.4	NA	NA	71	36.5	13.2	6.5	0.78	0	GOOD	NA	NA	NA	NA	NA	NA	NA	NA	NA	NA	NA	NA	N
HY.P2C9.CB	HS_P2_C9	HY-BAL-H3	/ 13 S	2019-06-07	Belize	Stann Creek District	-88.4	16.6	Cockscomb Basin	CB	BAL	Palm Springs	29.6	26.5	0	7	HY	H	NA	5.1	2.3	2.1	1.6	1.2	NA	NA	31	15.4	6	2.7	0.12	0	Excellent	Excellent	Excellent	Excellent	Excellent	Y	A	A/M	2L, 2R, 2, 2, 2	15	16	20	NA	Y
HY.P2D11.RHW	HS_P2_D11	HY976	976	2020-03-03	Belize	Orange Walk District	-88.6	18.2	Rio Hondo Watershed	RHW	Rio Hondo	Douglas Village, Orange Walk	NA	NA	0	NA	HY	SA	F	20.7	13	9.8	7	4.6	8	4.6	124	69.5	32	12.4	25	1	excellent	Excellent	Excellent	Excellent	Excellent	Y	A	A	NA	17	18	20	Captured in Consejo shores (18.46349 - 88.301019) and translocted to Douglas Rio Hondo	NA
HY.P2D9.CB	HS_P2_D9	HY945	945	2019-11-07	Belize	Stann Creek District	-88.2	16.9	Cockscomb Basin	CB	Stann Creek Coastline	Sitte River-Dangriga	30.5	28.3	39	8.3	HY	SA	F	14.5	8.9	5.5	4.6	3.2	4.4	3.7	97.1	46.4	19	8.6	2.56	1	Excellent	EXCELLENT	EXCELLENT	EXCELLENT	EXCELLENT	Y	A	A	2002-04-01	14	17	20	NA	Y
HY.P2E11.CB	HS_P2_E11	HY999	999	2020-04-01	Belize	Stann Creek District	-88.3	16.7	Cockscomb Basin	CB	Placencia lagoon	West Placencia lagoon	NA	NA	NA	NA	HY	J	F	10.3	5.6	4.2	3.1	2.1	2.9	1.6	68.6	33.6	13.6	8.4	0.82	0	excellent	EXCELLENT	EXCELLENT	Excellent	EXCELLENT	NA	A	M	NA	15	17	19	Not a formal survey. Survey with Paul Lister & Friends; Genetic tissue: HM8G	NA
HY.P2E9.NA	HS_P2_E9	HY_MR_H1	HY_MR_H1	29/06/2019	Belize	Toledo District	NA	NA	Northern Toledo Watershed	NTW	Monkey River	Monkey River	NA	NA	8	NA	HY	H	NA	NA	NA	NA	NA	NA	NA	NA	NA	NA	NA	NA	NA	NA	NA	NA	NA	NA	NA	NA	NA	NA	NA	NA	NA	NA	NA	NA
HY.P2F9.NA	HS_P2_F9	HY_MR_H2	HY_MR_H2	29/06/2019	Belize	Toledo District	NA	NA	Northern Toledo Watershed	NTW	Monkey River	Monkey River	NA	NA	8	NA	HY	H	NA	NA	NA	NA	NA	NA	NA	NA	NA	NA	NA	NA	NA	NA	NA	NA	NA	NA	NA	NA	NA	NA	NA	NA	NA	NA	NA	NA
HY.P2H6.CB	HS_P2_H6	HY946	946	2019-11-07	Belize	Stann Creek District	-88.2	16.9	Cockscomb Basin	CB	Stann Creek Coastline	Sitte River-Dangriga	29.9	27.5	40	8.3	HY	A	M	21.1	13.8	7.5	6	4.4	6.3	3.3	145.5	71	32.5	11	7.38	1	Excellent	EXCELLENT	EXCELLENT	EXCELLENT	EXCELLENT	Y	A	A	2002-01-04	16	17	19	NA	Y
HY.P3A2.NRW	HS_P3_A2	HY1351	1351	24/09/2019	Belize	Orange Walk District	-88.5	18.1	New River Watershed	NRW	New River	O.W./Corozal Border-Maracas	30.8	27.9	2	9.1	HY	J	F	13.4	8.1	5.9	4.8	3.2	5.7	2.6	87.5	42	13.8	7.8	1.4	1	Good	Excellent	G	Good	Excellent	Y	A	A	NA	16	18	22	NA	NA
HY.P3A5.NRW	HS_P3_A5	HY-H12/13A	2024-12-13	24/09/2019	Belize	Orange Walk District	-88.5	18.2	New River Watershed	NRW	New River	O.W./Corozal Border-Maracas	31.1	27	3	8.6	HY	H	F	7.3	4	3.1	2.5	1.6	2.9	1.1	48.4	23.4	8	4.1	0.2	1	Excellent	Excellent	Excellent	Excellent	Excellent	Y	A/M	A	NA	16	17	22	NA	NA
HY.P3B2.NRW	HS_P3_B2	HY1615	1615	2019-09-05	Belize	Orange Walk District	-88.6	17.9	New River Watershed	NRW	New River	Fireburn - Orange Walk Town	29.7	26.9	0	NA	HY	SA	F	19	11.8	7.2	6.4	4.4	5.6	3.3	113	62.5	29	11.8	6.4	1	Good	Great	Fair	Grey/strong	Great	Y	M	A	NA	15	19	20	Para on belly	NA
HY.P3B4.NRW	HS_P3_B4	HY12/16	2024-12-16	29/02/2020	Belize	Orange Walk District	-88.6	18.1	New River Watershed	NRW	New River	North bypass Bridge - South Bypass bridge	27.2	24.5	3	8	HY	H	M	6.1	3	2.6	1.8	1.3	1.7	1.8	39.6	19.6	6.4	3.2	0.12	0	excellent	Excellent	Good	GOOD	Excellent	Y	A	M	NA	16	18	18	NA	NA
HY.P3B5.NRW	HS_P3_B5	HY_H12_13B	12_13	24/09/2019	Belize	Orange Walk District	-88.5	18.2	New River Watershed	NRW	New River	O.W./Corozal Border-Maracas	30.4	28.3	3	8.1	HY	H	NA	6.6	3	2.6	2	1.3	2.3	1	41.4	19.7	7	3.5	0.16	0	Excellent	Excellent	Excellent	Excellent	EXCELLENT	Y	NA	A	NA	16A	18M	21M	NA	NA
HY.P3B7.CB	HS_P3_B7	HY699	699	25/10/2020	Belize	Stann Creek District	-88.4	16.6	Cockscomb Basin	CB	Placencia Lagoon	Flower Camp	NA	NA	10	NA	HY	SA	F	14	9.5	7.5	4.5	3.3	NA	NA	100.9	49.4	21.4	8.5	3.02	1	Excellent	Excellent	Excellent	Excellent	Excellent	NA	A	A	A	16	18	18	Captured in Toledo, relocated in Flower Camp by CRC land; NAME: PUPUSA; MICROCHIP: 981020023441306	NA
HY.P3B8.CB	HS_P3_B8	HY1184-GIL	1184	2020-10-05	Belize	Stann Creek District	-88.3	16.6	Cockscomb Basin	CB	Placencia Lagoon	North Lagoon	NA	NA	26	NA	HY	A	M	27.4	18.2	11.5	9	6.9	9	6.2	198.9	102	49	15.8	34	NA	Excellent	Excellent	Excellent	Excellent	Excellent	NA	A	A	A	16	18	18	Captured in tilapia pond in Toledo, relocated in Placencia Lagoon; MICROCHIP: 981 0200 2320 0669; NAME: GIL	NA
HY.P3C2.BRW	HS_P3_C2	HY1900	1900	20/07/2019	Belize	Belize District	-88.2	17.5	Belize River Watershed	BRW	Belize City	Haulover Creek/Belize River	29.2	28.2	4	8.4	HY	J	F	10.7	6.6	4.2	3.1	2.1	NA	NA	76.7	35.3	14.9	6.7	1.12	1	NA	EXCELLENT	EXCELLENT	EXCELLENT	EXCELLENT	Y	A	M	2024-04-02	15	18	21	Good tail width	Y
HY.P3C4.CB	HS_P3_C4	HY13/15	13-15	25/07/2019	Belize	Stann Creek District	-88.4	16.6	Cockscomb Basin	CB	Placencia Lagoon	Flower Camp	29	29.3	10	NA	HY	H	NA	6.5	3.6	2.5	1.9	1.2	NA	NA	40	20.2	6.3	3.2	0.12	1	Fair	FAIR	FAIR	GLASSY FAIR	GOOD	Y	M	A	NA	16	18	16	NA	Y
HY.P3C5.NRW	HS_P3_C5	HY_H2_14_15	14/15	14/01/2020	Belize	Orange Walk District	-88.5	18.1	New River Watershed	NRW	New River	San Estevan - OW north by-pass bridge	27.1	24	0	NA	HY	H	NA	5.8	2.8	2.5	1.8	1.2	1	1	38.4	18.6	6.1	3.5	0.12	0	GOOD	Good	Good	Good	Excellent	Y	NA	M	NA	16 A	17	20	NA	NA
HY.P3D2.BRW	HS_P3_D2	HY1901	1901	21/07/2019	Belize	Belize District	-88.3	17.5	Belize River Watershed	BRW	Belize City	Haulover Creek/Belize River	29.6	27.6	4	8.6	HY	J	NA	10.6	5.8	4.1	3.3	2.1	3.6	1.6	73	34.9	13.1	6.2	0.84	1	NA	EXCELLENT	FAIR	GOOD	GOOD	Y	M	A	2024-04-02	16	18	20	Excellent tail width	Y
HY.P3D4.BRW	HS_P3_D4	HY13-1	S:13-1	20/07/2019	Belize	Belize District	-88.2	17.5	Belize River Watershed	BRW	Belize City	Haulover Creek/Belize River	28.4	27.4	5	8.4	HY	J	NA	7.9	4.4	4	2.7	1.8	NA	NA	50	23.6	9	4.6	0.3	0	NA	EXCELLENT	EXCELLENT	EXCELLENT	EXCELLENT	Y	A	A	2024-04-02	15	18	21	Large crocs on new river were weary	N
HY.P3D5.NRW	HS_P3_D5	HY_H9_10	9_10	23/01/2020	Belize	Orange Walk District	-88.5	18	New River Watershed	NRW	New River	Shipyard - Orange Walk Town	26.3	21.5	3	8.2	HY	J	NA	9.7	5.4	4.2	2.6	1.8	2.7	1.7	54.8	26.2	9.8	4.9	NA	1	Fair	fair	Fair	Excellent	Good	Y	NA	M	NA	16	18	20	NA	N
HY.P3D8.NA	HS_P3_D8	HY_GILLY	GILLY	26/11/2020	Belize	NA	NA	NA	NA	NA	NA	NA	NA	NA	NA	NA	HY	A	NA	NA	NA	NA	NA	NA	NA	NA	NA	NA	NA	NA	NA	NA	NA	NA	NA	NA	NA	NA	NA	NA	NA	NA	NA	NA	NA	NA
HY.P3E1.NRW	HS_P3_E1	HY1093	1093	29/02/2020	Belize	Orange Walk District	-88.6	18.1	New River Watershed	NRW	New River	North bypass Bridge - South Bypass bridge	26.9	22	3	8.2	HY	J	M	10.8	6.4	4.5	3.3	2.3	3.7	2.3	72	34	12.8	6	0.84	1	excellent	Good	Excellent	GOOD	Good	Y	A	M	NA	16	17	20	981020023297893-981	NA
HY.P3E2.BRW	HS_P3_E2	HY1906	1906	22/07/2019	Belize	Belize District	-88.2	17.5	Belize River Watershed	BRW	Belize City	Fabers Lagoon	28.7	28	6	8.4	HY	SA	F	16.4	9.7	6	5.1	4.5	6.9	2.9	110.4	54	22	10.9	3.9	1	EXCELLENT	EXCELLENT	EXCELLENT	EXCELLENT	EXCELLENT	Y	A	A	NA	16	19	18	Excellent tail width; 981020023468695-981-5; pos: 4 AND NS: 2	Y
HY.P3E4.BRW	HS_P3_E4	HY13-14-H1	13-14-H1	21/07/2019	Belize	Belize District	-88.3	17.5	Belize River Watershed	BRW	Belize City	Haulover Creek/Belize River	29.7	27.3	3	8.6	HY	H	NA	7	4	2.4	2.3	1.6	1.9	1.5	44.5	21.4	8.9	3.8	0.22	0	NA	EXCELLENT	EXCELLENT	EXCELLENT	EXCELLENT	Y	M	A	2024-04-02	16	18	17	Good tail width	Y
HY.P3E5.CB	HS_P3_E5	HY1161	1161	2020-01-10	Belize	Stann Creek District	-88.4	16.6	Cockscomb Basin	CB	Placencia Lagoon	Flower Camp	NA	NA	35	NA	HY	J	F	10.2	5.9	4	2.8	2	2.9	2	67.5	33.2	13	6.5	0.86	1	Good	Excellent	Good	Excellent	Excellent	NA	H	H	H	15	16A	16M	Name: Hope; Saved from being sold in Flowers bank	NA
HY.P3E8.NA	HS_P3_E8	HY_SAM	SAM	26/11/2020	Belize	NA	NA	NA	NA	NA	NA	NA	NA	NA	NA	NA	HY	A	NA	NA	NA	NA	NA	NA	NA	NA	NA	NA	NA	NA	NA	NA	NA	NA	NA	NA	NA	NA	NA	NA	NA	NA	NA	NA	NA	NA
HY.P3F4.BRW	HS_P3_F4	HY13-14-H2	13-14-H2	21/07/2019	Belize	Belize District	-88.3	17.5	Belize River Watershed	BRW	Belize City	Haulover Creek/Belize River	29	27.6	4	8.5	HY	H	NA	7.5	3.9	3.3	2.6	1.4	3.7	1.7	45.6	22.5	8	4	0.22	0	NA	EXCELLENT	EXCELLENT	EXCELLENT	EXCELLENT	Y	A	A	2	17	19	18	Good tail width	Y
HY.P3F5.CB	HS_P3_F5	HY1191	1191	26/01/2021	Belize	Stann Creek District	-88.3	16.8	Cockscomb Basin	CB	Sittee RIver	Sittee River	26.9	24.5	3	NA	HY	SA	M	19.5	12.5	8.5	6	4.4	6.4	4.2	133	64	28.5	13.1	7	0	Excellent	Good	EXCELLENT	GOOD	GOOD	Y	NA	M	NA	16	18	20	taken out from a fish pond in dangriga and relocated in Sittee; microchip: 981020023309330-981	N
HY.P3G1.CB	HS_P3_G1	HY1183B	1183	2020-03-03	Belize	Stann Creek District	-88.4	16.6	Cockscomb Basin	CB	Placencia lagoon	Flower Camp	NA	NA	13.5	8.6	HY	H	M	12	7.1	4.9	3.3	2.4	3.5	2.6	40.4	81	16.8	6.6	1.74	0	Excellent	EXCELLENT	EXCELLENT	Excellent	EXCELLENT	NA	M	M	NA	16	19	21	Captured from Santa Rosa relocated to Flower Camp; 981020023450332; Tortilla	N
HY.P3G11.NSLW	HS_P3_G11	HY942	942	2018-12-08	Belize	Belize District	-88.3	17.2	N/S Lagoon Watershed	NSLW	Gales Point	Southern Lagoon	29.2	27.4	0	NA	HY	SA	M	21	13.4	8	7.8	5.2	10.5	3	137.2	68.6	11.3	29.1	8.6	1	NA	NA	NA	NA	NA	NA	NA	NA	NA	NA	NA	NA	NA	N
HY.P3G5.CB	HS_P3_G5	HY1183A	1183	2018-08-12	Belize	Stann Creek District	-88.3	17.1	Cockscomb Basin	CB	Placencia Lagoon	Maya Beach (Ana's canal)	28.4	28.4	NA	8.4	HY	J	NA	6.6	3.2	3.8	2.4	2.2	NA	NA	40.6	NA	7.4	3.9	NA	0	NA	NA	NA	NA	NA	Y	NA	NA	Y	NA	NA	NA	NA	NA
HY.P3H1.CB	HS_P3_H1	HY1188	1188	31/08/2019	Belize	Stann Creek District	-88.3	16.8	Cockscomb Basin	CB	Sittee River	Lily Pond to Curry Bar	31.4	26.3	3	8.8	HY	J	NA	10	5.7	3.8	3.1	2.1	4.4	1.7	66.1	33.5	13	5.5	0.793787	0	Excellent	EXCELLENT	EXCELLENT	EXCELLENT	EXCELLENT	Y	M	A	NA	15	17	18	NA	NA
HY.P3H11.NSLW	HS_P3_H11	HY943	943	13/08/2018	Belize	Belize District	-88.3	17.2	N/S Lagoon Watershed	NSLW	Southern Lagoon	Quashie Trap	30.7	28.2	7	NA	HY	SA	M	16.2	10	5	4.9	3.9	5.2	2.5	99.3	48.7	20.3	8.9	3.6	1	NA	NA	NA	NA	NA	NA	NA	NA	NA	NA	NA	NA	NA	N
HY.P3H4.NRW	HS_P3_H4	HY_H1_14_15	14/15	14/01/2020	Belize	Orange Walk District	-88.5	18.1	New River Watershed	NRW	New River	San Estevan - OW north by-pass bridge	26.4	26.4	0	8.4	HY	H	NA	5.8	2.8	2.5	2	1.3	1.8	1.1	39.3	18.4	6.4	3.3	0.12	0	GOOD	Excellent	GOOD	Good	Excellent	y	NA	NA	M	16 M	18 M	18M	NA	NA
HY.P3H5.BRW	HS_P3_H5	HY978	978	14/10/2020	Belize	Belize District	-88.4	16.6	Belize River Watershed	BRW	Ladyville	Parrot Street	NA	NA	1	NA	HY	SA	M	17.2	10.4	6.6	5.6	3.9	4.9	3.9	116.5	55.5	24.5	9.6	4.79	1	Good	GOOD	GOOD	GOOD	GOOD	NA	NA	NA	M	16	18	20	Name: Lee; Captured in ladyville Parrot st and relocated in placencia lagoon	N
HY.P3H6.CB	HS_P3_H6	HY901	901	17/06/2020	Belize	Stann Creek District	-88.4	16.6	Cockscomb Basin	CB	Placencia Lagoon	Maya Beach	NA	NA	0	NA	HY	SA	M	18.1	12	7.2	5.8	3.8	6	3.5	128	61.4	26.3	11	10.2	0	26.3/ Excellent	Good	Good	Good	Good	Y	A	A	A	16	18	20	Was picked up at Bze city and brought to placencia lagoon; NAME: Jimjanjay	Minor Scrapes
HY.P3H8.CB	HS_P3_H8	HY_HATCH_15_79	H 15	28/01/2021	Belize	Stann Creek District	-88.4	16.7	Cockscomb Basin	CB	Placencia Lagoon	BAL, Effluent Ponds	26.4	25	3	NA	HY	H	M	7.7	4	3.1	2	1.5	2.1	1.6	48	24.6	8.9	4.4	0.26	0	good	excellent	good	good	good	NA	NA	M	M	16	18	19	NA	NA
HY.P4A2.CB	HS_P4_A2	HY1184	1184	20/02/2019	Belize	Stann Creek District	-88.4	16.6	Cockscomb Basin	CB	BAL	Fern Gully	NA	NA	4	NA	HY	SA	M	15	9.2	6.6	5	3.7	5.5	2.6	96.8	49.5	21	9	2.94	1	NA	NA	NA	NA	NA	NA	NA	NA	NA	NA	NA	NA	FIESTY	NA
HY.P4E2.CB	HS_P4_E2	HY1175a	1175	21/04/2018	Belize	Stann Creek District	-88.4	16.6	Cockscomb Basin	CB	Placencia Lagoon	Flowercamp	30.5	28.1	34	7.9	HY	J	NA	13	7.3	5.2	3.5	2.7	5.5	2.8	89	43	19	7	4.5	1	NA	NA	NA	NA	NA	NA	NA	NA	NA	NA	NA	NA	Ranger	N
MCA.P1A6.NTW	HS_P1_A6	MCA922B	922	18/03/2018	Belize	Toledo District	-88.5	16.4	Northern Toledo Watershed	NTW	Monkey River	Mouth of Monkey River to 14km upstream	29.4	27.6	5	7	MCA	J	NA	12.7	7.9	3.8	3.5	2.6	5	1.8	77.5	39.4	17.9	7	1.8	0	NA	NA	NA	NA	NA	NA	NA	NA	NA	NA	NA	NA	NA	N
MCA.P1A7.CB	HS_P1_A7	MCA-H2A	11(1)	30/06/2018	Belize	Stann Creek District	-88.4	16.6	Cockscomb Basin	CB	BAL	Tarpon Bridge	29.6	27.3	0	6.26	MCA	H	NA	4.7	2.1	3.1	1.8	1.2	0.8	0.3	31	13.2	6.1	2.1	NA	0	NA	NA	NA	NA	NA	NA	NA	NA	NA	NA	NA	NA	NA	NA
MCA.P1A8.CB	HS_P1_A8	MCA906	906	26/06/2016	Belize	Stann Creek District	-88.4	16.6	Cockscomb Basin	CB	BAL	Effluent pond; 3rd canal	29.6	25.4	3	NA	MCA	J	NA	10.4	6.1	2.8	2.4	1.8	NA	NA	70.7	35.6	13.7	NA	NA	0	NA	NA	NA	NA	NA	NA	NA	NA	NA	NA	NA	NA	NA	NA
MCA.P1B11.NRW	HS_P1_B11	MCA-HATCH2	11(2)	2018-02-10	Belize	Orange Walk District	-88.6	18.1	New River Watershed	NRW	New River	Orange Walk North	29	25.8	0	8.15	MCA	H	M	5.5	2.7	2	2	1.4	NA	NA	35.3	16.6	5.6	3.4	NA	0	Healthy	Good	Legs ok	Good	Good	NA	NA	NA	NA	NA	NA	NA	NA	NA
MCA.P1B2.STW	HS_P1_B2	MCA925	925	24/04/2018	Belize	Toledo District	-88.7	16.3	Southern Toledo Watershed	STW	Golden Stream	Golden Stream	29.2	26.3	12	8.2	MCA	J	NA	14.5	8.7	5.8	4.4	NA	6.8	2.5	87.6	45.7	13	7.2	NA	0	NA	NA	NA	NA	NA	NA	NA	NA	NA	NA	NA	NA	Missing half of top jaw and emaciated	Y
MCA.P1B6.CB	HS_P1_B6	MCA923A	923	21/04/2018	Belize	Stann Creek District	-88.4	16.6	Cockscomb Basin	CB	Placencia Lagoon	Flowercamp	30.5	27.7	35	8	MCA	J	NA	10	6.1	3.9	3.2	2.1	3.1	2	70.5	34	15	5.8	1.4	0	NA	NA	NA	NA	NA	NA	NA	NA	NA	NA	NA	NA	NA	N
MCA.P1B7.CB	HS_P1_B7	MCA-H2B	11(2)	30/06/2018	Belize	Stann Creek District	-88.4	16.6	Cockscomb Basin	CB	BAL	Tarpon Bridge	29.6	27.3	0	6.26	MCA	H	M	4.9	2.2	2.8	1.8	1.1	0.7	0.3	29.1	14	6.1	2.4	NA	0	NA	NA	NA	NA	NA	NA	NA	NA	NA	NA	NA	NA	NA	NA
MCA.P1B8.CB	HS_P1_B8	MCA907	907	16/07/2016	Belize	Stann Creek District	-88.4	16.6	Cockscomb Basin	CB	BAL	Molly Manor	31	27	25	NA	MCA	J	NA	12.3	7.5	3.4	3.2	1.8	3.1	1.7	84.8	41.8	18	NA	1.5	1	NA	NA	NA	NA	NA	NA	NA	NA	NA	NA	NA	NA	NA	NA
MCA.P1C11.NRW	HS_P1_C11	MCA_HATCH5	11(1)	2018-02-10	Belize	Orange Walk District	-88.6	18.1	New River Watershed	NRW	New River	Orange Walk North	29	25.8	0	8.15	MCA	H	M	5.2	2.5	2.1	1.7	1.2	NA	NA	33.4	16	5.2	3.1	NA	0	Skinny	Little flaking on tail	Back legs not firm, skinny	Good	Good	NA	NA	NA	NA	NA	NA	NA	NA	NA
MCA.P1C2.STW	HS_P1_C2	MCA926	926	26/04/2018	Belize	Toledo District	-88.7	16.4	Southern Toledo Watershed	STW	Deep River	Deep River	28	27	5	8.4	MCA	J	NA	11.8	7.1	4.2	3.3	2.4	4	2.1	68.4	35	11.6	5.3	0.9	0	NA	NA	NA	NA	NA	NA	NA	NA	NA	NA	NA	NA	NA	Missing tip of the tail
MCA.P1C5.CB	HS_P1_C5	MCA910A	1161	2016-05-08	Belize	Stann Creek District	-88.4	16.6	Cockscomb Basin	CB	BAL	Fer de lance Bridge	32	27.4	5	NA	MCA	SA	F	12.8	7.9	3.8	4	2.1	NA	NA	91	44.2	19.7	NA	2.4	1	NA	NA	NA	NA	NA	NA	NA	NA	NA	NA	NA	NA	CLOACA = 90.9C; WEIRD NICTATING MEMBRANE	NA
MCA.P1C6.NTW	HS_P1_C6	MCA923B	923	19/06/2018	Belize	Toledo District	-88.6	16.4	Northern Toledo Watershed	NTW	Payne's Creek	Croc Pond	NA	NA	0	NA	MCA	J	M	8.1	4.5	3.7	2.5	1.6	3.6	1.7	49.4	24.6	9.4	3.9	0.5	0	NA	NA	NA	NA	NA	NA	NA	NA	NA	NA	NA	NA	Blood glucose syringe: 3.1; clip: 4.8	N
MCA.P1C7.CB	HS_P1_C7	MCA-H2C	11(3)	30/06/2018	Belize	Stann Creek District	-88.4	16.6	Cockscomb Basin	CB	BAL	Tarpon Bridge	29.6	27.3	0	6.26	MCA	H	NA	4.5	2	2.6	1.5	0.9	0.6	0.3	28.5	13.4	6.8	2.4	NA	0	NA	NA	NA	NA	NA	NA	NA	NA	NA	NA	NA	NA	NA	NA
MCA.P1C8.CB	HS_P1_C8	MCA908	908	20/07/2016	Belize	Stann Creek District	-88.4	16.6	Cockscomb Basin	CB	BAL	Tarpon Bridge	31.9	27.2	18	NA	MCA	J	NA	8.4	4.6	2.4	2.1	1.5	NA	NA	50	25	8.8	NA	NA	1	NA	NA	NA	NA	NA	NA	NA	NA	NA	NA	NA	NA	NA	NA
MCA.P1D2.STW	HS_P1_D2	MCA927	927	26/04/2018	Belize	Toledo District	-88.7	16.4	Southern Toledo Watershed	STW	Deep River	Deep River	28.4	26.5	5	8.4	MCA	J	NA	10	5.8	3.7	2.6	1.9	3.8	1.5	60.2	30.8	11.4	3.6	0.45	0	NA	NA	NA	NA	NA	NA	NA	NA	NA	NA	NA	NA	NA	NA
MCA.P1D5.BRW	HS_P1_D5	MCA910B	910	18/06/2017	Belize	Belize District	-88.5	17.5	Belize River Watershed	BRW	Cox Lagoon	Cox Lagoon	26.3	23.1	0	NA	MCA	J	NA	9.8	5.8	5	3.4	2.6	NA	NA	56.1	26.9	9.8	5.4	NA	0	NA	NA	NA	NA	NA	NA	NA	NA	NA	NA	NA	NA	No hardcopy sheets	N
MCA.P1D6.STW	HS_P1_D6	MCA924	924	24/04/2018	Belize	Toledo District	-88.7	16.3	Southern Toledo Watershed	STW	Golden Stream	Golden Stream	29.2	27.2	5	8.1	MCA	J	NA	8.4	5.6	2.3	2.4	1.7	2.7	1	50.9	25.8	9	4.2	NA	0	NA	NA	NA	NA	NA	NA	NA	NA	NA	NA	NA	NA	NA	N
MCA.P1D7.CB	HS_P1_D7	MCA-H2D	11(4)	30/06/2018	Belize	Stann Creek District	-88.4	16.6	Cockscomb Basin	CB	BAL	Tarpon Bridge	29.6	27.3	0	6.26	MCA	H	NA	4.9	2.1	3	2.6	1.1	0.8	0.2	28.1	13.3	6	2.8	NA	0	NA	NA	NA	NA	NA	NA	NA	NA	NA	NA	NA	NA	NA	NA
MCA.P1D8.CB	HS_P1_D8	MCA912	912	2017-02-04	Belize	Stann Creek District	-88.4	16.6	Cockscomb Basin	CB	BAL	Tarpon Bridge	27.2	24.6	19	7.5	MCA	J	F	10	5.6	2.9	3.2	2.4	2	1.7	60.2	29.6	11.6	5.8	NA	0	NA	NA	NA	NA	NA	NA	NA	NA	NA	NA	NA	NA	NA	NA
MCA.P1E2.STW	HS_P1_E2	MCA928	928	26/04/2018	Belize	Toledo District	-88.7	16.4	Southern Toledo Watershed	STW	Deep River	Deep River	28	26.6	5	8.5	MCA	J	NA	8.4	5	4.3	2.5	1.8	3.7	1.6	50.4	24.1	9.7	3.8	0.9	0	NA	NA	NA	NA	NA	NA	NA	NA	NA	NA	NA	NA	NA	NA
MCA.P1E5.CB	HS_P1_E5	MCA910C	910	25/05/2017	Belize	Stann Creek District	-88.4	16.6	Cockscomb Basin	CB	BAL	Canal	28.8	30.5	25	NA	MCA	J	F	14.1	8.5	5.6	3.7	2.8	3.6	2.3	85.8	43.6	17.7	6.5	NA	0	NA	NA	NA	NA	NA	NA	NA	NA	NA	NA	NA	NA	NA	NA
MCA.P1E6.STW	HS_P1_E6	MCA936	936	26/04/2018	Belize	Toledo District	-88.7	16.3	Southern Toledo Watershed	STW	Deep River	Deep River	29.4	25.9	10	8.1	MCA	J	NA	8.6	5.3	3.7	2.6	1.7	3.1	1.8	53.9	26.9	10.4	3.4	NA	0	NA	NA	NA	NA	NA	NA	NA	NA	NA	NA	NA	NA	NA	NA
MCA.P1E7.CB	HS_P1_E7	MCA-H2E	11(5)	30/06/2018	Belize	Stann Creek District	-88.4	16.6	Cockscomb Basin	CB	BAL	Tarpon Bridge	29.6	27.3	0	6.26	MCA	H	M	4.7	2.2	2.9	1.8	1.3	NA	NA	29.5	13.5	6	2.5	NA	0	NA	NA	NA	NA	NA	NA	NA	NA	NA	NA	NA	NA	NA	NA
MCA.P1E8.CB	HS_P1_E8	MCA914	914	2017-02-04	Belize	Stann Creek District	-88.4	16.6	Cockscomb Basin	CB	BAL	Tarpon Bridge	27.7	25.3	19	NA	MCA	J	M	8.5	5	2.5	2.7	2	2.1	1.2	49.2	25.2	10	4.3	NA	0	NA	NA	NA	NA	NA	NA	NA	NA	NA	NA	NA	NA	NA	NA
MCA.P1F2.STW	HS_P1_F2	MCA929	929	26/04/2018	Belize	Toledo District	-88.7	16.4	Southern Toledo Watershed	STW	Deep River	Deep River	28	26.6	5	8.3	MCA	J	NA	12.2	8.1	4.7	3.4	2.2	4.9	2.1	73.8	37.4	14.9	5.6	0.9	0	NA	NA	NA	NA	NA	NA	NA	NA	NA	NA	NA	NA	NA	NA
MCA.P1F6.STW	HS_P1_F6	MCA937	937	26/04/2018	Belize	Toledo District	-88.7	16.3	Southern Toledo Watershed	STW	Deep River	Deep River	29.4	26.3	15	8.1	MCA	J	NA	9.7	4	4.1	3	1.2	3.7	1.9	62.2	29.7	11.7	5.4	0.45	0	NA	NA	NA	NA	NA	NA	NA	NA	NA	NA	NA	NA	NA	Missing a toe, back left, 3rd toe
MCA.P1F7.BC	HS_P1_F7	MCA900	900	30/03/2014	Belize	Belize District	-88.3	17.6	Belize River Watershed	BRW	Belize City	Ladyville	NA	NA	0	NA	MCA	A	M	45	31.4	NA	NA	NA	NA	NA	307	NA	NA	NA	NA	0	NA	NA	NA	NA	NA	NA	NA	NA	NA	NA	NA	NA	0A02210345; Libor	NA
MCA.P1F8.NTW	HS_P1_F8	MCA915	915	13/02/2017	Belize	Toledo District	-88.5	16.4	Northern Toledo Watershed	NTW	Monkey River	Monkey River	25.7	24.5	8	NA	MCA	SA	M	17.6	11.6	5.6	4.1	2.9	4.9	2	111.1	53	24	7.5	1.6	0	NA	NA	NA	NA	NA	NA	NA	NA	NA	NA	NA	NA	NA	None
MCA.P1G2.STW	HS_P1_G2	MCA930B	930	26/04/2018	Belize	Toledo District	-88.7	16.4	Southern Toledo Watershed	STW	Deep River	Deep River	28.6	26.7	5	8.4	MCA	H	NA	7.6	4.4	3.1	2.2	1.7	2.5	1.8	46.9	22.5	8.4	3.4	0.9	0	NA	NA	NA	NA	NA	NA	NA	NA	NA	NA	NA	NA	NA	NA
MCA.P1G5.CB	HS_P1_G5	MCA920	920	21/04/2018	Belize	Stann Creek District	-88.4	16.6	Cockscomb Basin	CB	Placencia Lagoon	Flowercamp	30.1	28.5	35	7.8	MCA	J	NA	11.8	7	4.3	3.1	2.1	2.4	2	77.5	37.8	14.8	6.1	0.8	0	NA	NA	NA	NA	NA	NA	NA	NA	NA	NA	NA	NA	NA	N
MCA.P1G6.CB	HS_P1_G6	MCA938	938	24/11/2018	Belize	Stann Creek District	-88.3	16.6	Cockscomb Basin	CB	Placencia Lagoon	Placencia Hotel	NA	NA	NA	NA	MCA	A	M	30.2	20.5	12	10.5	8	10.7	4.5	201	103	58.2	15.2	40	1	excellent	NA	NA	NA	NA	NA	NA	NA	NA	NA	NA	NA	Problem croc removal and relocation to Cabbage Haul creek; Finn	N
MCA.P1G7.CB	HS_P1_G7	MCA903	903	2017-03-05	Belize	Stann Creek	-88.3	16.7	Cockscomb Basin	CB	Peninsula Lagoon Side	Punta Placencia/N lagoon	32.7	27	5	NA	MCA	J	M	10.3	6.4	4.3	3.5	2.4	NA	NA	62.7	30.5	11.8	5.2	0.6	0	NA	NA	NA	NA	NA	NA	NA	NA	NA	NA	NA	NA	NA	N
MCA.P1G8.CB	HS_P1_G8	MCA916	916	27/02/2017	Belize	Stann Creek District	-88.4	16.6	Cockscomb Basin	CB	Cockscomb	Tex Mar	30.1	27.8	5	NA	MCA	SA	M	13.9	8.6	5	4.5	3.3	3.8	2.5	91.6	44.2	16.3	7	1.6	1	NA	NA	NA	NA	NA	NA	NA	NA	NA	NA	NA	NA	NA	N
MCA.P1H2.STW	HS_P1_H2	MCA935	935	26/04/2018	Belize	Toledo District	-88.7	16.3	Southern Toledo Watershed	STW	Deep River	Deep River	29.5	27.6	11	8.2	MCA	A	M	28.3	19.4	10.2	7.6	5.4	13	4.7	181.7	89.1	41.9	13.5	24.5	0	NA	NA	NA	NA	NA	NA	NA	NA	NA	NA	NA	NA	Croc with dear from NES of the 25th	NA
MCA.P1H5.CB	HS_P1_H5	MCA922A	922	21/04/2018	Belize	Stann Creek District	-88.4	16.6	Cockscomb Basin	CB	Placencia Lagoon	Flowercamp	30.5	28.5	33	7.6	MCA	J	NA	9.7	5.6	4.5	3.4	2.3	1.9	1.7	64.6	32.2	15.1	5.2	1.4	0	NA	NA	NA	NA	NA	NA	NA	NA	NA	NA	NA	NA	NA	N
MCA.P1H6.CB	HS_P1_H6	MCA911	911	30/10/2016	Belize	Stann Creek District	NA	NA	Cockscomb Basin	CB	Placencia Lagoon	PLACENCIA	NA	NA	NA	NA	MCA	NA	NA	NA	NA	NA	NA	NA	NA	NA	NA	NA	NA	NA	NA	NA	NA	NA	NA	NA	NA	NA	NA	NA	NA	NA	NA	NA	NA	NA
MCA.P1H7.CB	HS_P1_H7	MCA905	905	26/06/2016	Belize	Stann Creek District	-88.4	16.6	Cockscomb Basin	CB	BAL	Effluent pond; 3rd canal	26	29.1	3	NA	MCA	SA	M	16.3	10	3.9	4.7	2.9	3.5	2.2	105	53.1	23.9	NA	NA	1	NA	NA	NA	NA	NA	NA	NA	NA	NA	NA	NA	NA	NA	NA
MCA.P1H8.BRW	HS_P1_H8	MCA917	917	18/06/2017	Belize	Belize District	-88.5	17.5	Belize River Watershed	BRW	Cox Lagoon	Cox Lagoon	25.4	22.8	0	NA	MCA	J	NA	9.7	5.5	4.5	3.8	3	NA	NA	60.6	28.9	11.9	5.2	0.9	0	NA	NA	NA	NA	NA	NA	NA	NA	NA	NA	NA	NA	NA	N
MCA.P2A9.CB	HS_P2_A9	MCA-BAL-H1	/ 13 S	2019-06-07	Belize	Stann Creek District	-88.4	16.6	Cockscomb Basin	CB	BAL	Palm Springs	29.6	26.5	0	7	MCA	H	NA	5.1	2.3	2	1.5	1.1	NA	NA	31.5	15.5	6.1	2.8	NA	0	Excellent	Excellent	Excellent	Excellent	Excellent	Y	A	A	NA	NA	NA	NA	NA	Y
MCA.P2B9.CB	HS_P2_B9	MCA-BAL-H2	/ 13 S	2019-06-07	Belize	Stann Creek District	-88.4	16.6	Cockscomb Basin	CB	BAL	Palm Springs	29.6	26.5	0	7	MCA	H	NA	5	2.5	2	1.5	1.2	NA	NA	31.9	16	6.2	2.7	0.12	0	Excellent	Excellent	Excellent	Excellent	Excellent	Y	A	A	2L 2R, 4, 2	15	17	18	NA	Y
MCA.P2G10.NA	HS_P2_G10	UK1	NA	NA	Belize	NA	NA	NA	NA	NA	NA	NA	NA	NA	NA	NA	MCA	NA	NA	NA	NA	NA	NA	NA	NA	NA	NA	NA	NA	NA	NA	NA	NA	NA	NA	NA	NA	NA	NA	NA	NA	NA	NA	NA	NA	NA
MCA.P2H10.NA	HS_P2_H10	UK2	NA	NA	Belize	NA	NA	NA	NA	NA	NA	NA	NA	NA	NA	NA	MCA	NA	NA	NA	NA	NA	NA	NA	NA	NA	NA	NA	NA	NA	NA	NA	NA	NA	NA	NA	NA	NA	NA	NA	NA	NA	NA	NA	NA	NA
MCA.P3B11.CB	HS_P3_B11	MCA930A	930	13/06/2017	Belize	Stann Creek District	-88.4	16.6	Cockscomb Basin	CB	BAL	Tarpon Bridge/Duke city	27	25.7	0	NA	MCA	J	NA	11.1	6.8	4.9	4.5	2.7	NA	NA	70.1	34.2	12.8	5.5	0.9	0	NA	NA	NA	NA	NA	NA	NA	NA	NA	NA	NA	NA	NA	NA
MCA.P3C11.STW	HS_P3_C11	MCA931	931	26/04/2018	Belize	Toledo District	-88.7	16.4	Southern Toledo Watershed	STW	Payne's Creek	Deep River	28.5	26.8	5	8.2	MCA	J	NA	9.5	5.4	4.4	2.7	1.9	3.4	2.3	56.8	28.3	11.1	4.3	0.45	0	NA	NA	NA	NA	NA	NA	NA	NA	NA	NA	NA	NA	NA	NA
MCA.P3D11.STW	HS_P3_D11	MCA933	933	26/04/2018	Belize	Toledo District	-88.7	16.4	Southern Toledo Watershed	STW	Payne's Creek	Deep River	28.9	27.2	12	8.3	MCA	H	M	7.5	3.7	3.4	2.3	1.4	3	1.2	40.3	20.2	7	3.3	NA	0	NA	NA	NA	NA	NA	NA	NA	NA	NA	NA	NA	NA	NA	NA
MCA.P3E11.STW	HS_P3_E11	MCA934	934	26/04/2018	Belize	Toledo District	-88.7	16.4	Southern Toledo Watershed	STW	Payne's Creek	Deep River	29	25	10	8.3	MCA	J	NA	12.3	7.1	4.6	3.5	2.3	6	2.1	75.2	35.1	15	5.8	1.8	0	NA	NA	NA	NA	NA	NA	NA	NA	NA	NA	NA	NA	NA	NA
MCA.P4C1.STW	HS_P4_C1	MCA940	940	26/04/2018	Belize	Toledo District	-88.7	16.3	Southern Toledo Watershed	STW	Payne's Creek	Deep River	29.4	26.6	15	8.1	MCA	J	NA	11.4	6.7	1.7	3	2	4	2.1	51.1	30.2	9.6	4.6	0.45	0	NA	NA	NA	NA	NA	NA	NA	NA	NA	NA	NA	NA	Not possible to do 938 because missing whole extremal part of tail	Missing tip of the tail, brown discolored teeth
MCA.P4F2.NA	HS_P4_F2	UK_P4_F2	NA	NA	Belize	NA	NA	NA	NA	NA	NA	NA	NA	NA	NA	NA	MCA	NA	NA	NA	NA	NA	NA	NA	NA	NA	NA	NA	NA	NA	NA	NA	NA	NA	NA	NA	NA	NA	NA	NA	NA	NA	NA	NA	NA	NA
MCA.P4G2.CB	HS_P4_G2	MCA941	941	2018-01-07	Belize	Stann Creek District	-88.4	16.6	Cockscomb Basin	CB	Placencia Lagoon	Flowercamp	31.7	29	5	7.56	MCA	J	M	10.2	5.6	4.8	3	2.3	3.9	1.6	58	30	12	4.6	NA	0	excellent	NA	NA	NA	NA	NA	NA	NA	NA	NA	NA	NA	NA	scute 3.7
