# Supplementary material
Source: Research Square preprint supplement (doi:10.21203/rs.3.rs-9024495/v1)
Supplement: Supplementary file 4 [file a4f3c39940a7bfa11416750a.xlsx]

## Sheet: Supplemental File S3. Admixture
Sample	Morphological Species Group	Sampling Locality	Sampling Locality Abbreviation	ADMIXTURE Group Assignment	ADMIXTURE Cluster assignment	Q-score acutus_A	Q-score acutus_B	Q-score acutus	Q-score moreletii
MCA.P1A6.NTW	MCA	Northern Toledo Watershed	NTW	Hybrid_acutus	2	0.394391	0.390332	0.78	0.215276
CM.P1A9.NSLW	CM	N/S Lagoon Watershed	NSLW	Hybrid_acutus	2	0.515099	0.320594	0.84	0.164306
CM.P1B9.NSLW	CM	N/S Lagoon Watershed	NSLW	Hybrid_acutus	3	0.283629	0.455298	0.74	0.261073
MCA.P1G7.CB	MCA	Cockscomb Basin	CB	Hybrid_acutus	2	0.459013	0.384732	0.84	0.156254
HY.P2E9.NA	HY	Northern Toledo Watershed	NTW	Hybrid_acutus	2	0.579047	0.103689	0.68	0.317264
HY.P2F9.NA	HY	Northern Toledo Watershed	NTW	Hybrid_acutus	2	0.575914	0.085084	0.66	0.339002
HY.P3G11.NSLW	HY	N/S Lagoon Watershed	NSLW	Hybrid_acutus	3	0.194576	0.552706	0.75	0.252718
HY.P3H11.NSLW	HY	N/S Lagoon Watershed	NSLW	Hybrid_acutus	2	0.546587	0.242129	0.79	0.211284
MCA.P1C2.STW	MCA	Southern Toledo Watershed	STW	acutus_A	2	0.99998	1e-05	1	1e-05
HY.P1C4.CB	HY	Cockscomb Basin	CB	acutus_A	2	0.925756	1e-05	0.93	0.074234
MCA.P1D2.STW	MCA	Southern Toledo Watershed	STW	acutus_A	2	0.99998	1e-05	1	1e-05
MCA.P1E2.STW	MCA	Southern Toledo Watershed	STW	acutus_A	2	0.99998	1e-05	1	1e-05
MCA.P1E5.CB	MCA	Cockscomb Basin	CB	acutus_A	2	0.901929	1e-05	0.9	0.098061
MCA.P1E6.STW	MCA	Southern Toledo Watershed	STW	acutus_A	2	0.99998	1e-05	1	1e-05
MCA.P1F2.STW	MCA	Southern Toledo Watershed	STW	acutus_A	2	0.99998	1e-05	1	1e-05
MCA.P1F6.STW	MCA	Southern Toledo Watershed	STW	acutus_A	2	0.99998	1e-05	1	1e-05
MCA.P1G2.STW	MCA	Southern Toledo Watershed	STW	acutus_A	2	0.99998	1e-05	1	1e-05
MCA.P1G6.CB	MCA	Cockscomb Basin	CB	acutus_A	2	0.970749	0.029241	1	1e-05
MCA.P1G8.CB	MCA	Cockscomb Basin	CB	acutus_A	2	0.939686	1e-05	0.94	0.060304
MCA.P1H2.STW	MCA	Southern Toledo Watershed	STW	acutus_A	2	0.99998	1e-05	1	1e-05
MCA.P2B9.CB	MCA	Cockscomb Basin	CB	acutus_A	2	0.926925	1e-05	0.93	0.073065
MCA.P2H10.NA	MCA	NA	NA	acutus_A	2	0.99998	1e-05	1	1e-05
MCA.P3C11.STW	MCA	Southern Toledo Watershed	STW	acutus_A	2	0.964667	1e-05	0.96	0.035323
MCA.P3D11.STW	MCA	Southern Toledo Watershed	STW	acutus_A	2	0.99998	1e-05	1	1e-05
MCA.P4C1.STW	MCA	Southern Toledo Watershed	STW	acutus_A	2	0.99998	1e-05	1	1e-05
CA.P1A12.NC	CA	Northern Cayes	NC	acutus_B	3	1e-05	0.99998	1	1e-05
MCA.P1B11.NRW	MCA	New River Watershed	NRW	acutus_B	3	1e-05	0.99998	1	1e-05
CA.P1B12.NC	CA	Northern Cayes	NC	acutus_B	3	0.037704	0.950651	0.99	0.011644
CA.P1C12.NC	CA	Northern Cayes	NC	acutus_B	3	1e-05	0.99998	1	1e-05
CA.P1E11.NC	CA	Northern Cayes	NC	acutus_B	3	1e-05	0.99998	1	1e-05
CA.P1E12.NC	CA	Northern Cayes	NC	acutus_B	3	0.034504	0.955172	0.99	0.010324
CA.P1F12.NC	CA	Northern Cayes	NC	acutus_B	3	1e-05	0.99998	1	1e-05
CA.P1G11.NC	CA	Northern Cayes	NC	acutus_B	3	0.002978	0.996843	1	0.000179
CA.P1H12.NC	CA	Northern Cayes	NC	acutus_B	3	1e-05	0.99998	1	1e-05
CA.P2A3.CC	CA	Coastal Cayes	CC	acutus_B	3	1e-05	0.99998	1	1e-05
CA.P2A4.CC	CA	Coastal Cayes	CC	acutus_B	3	1e-05	0.99998	1	1e-05
CA.P2A5.CC	CA	Coastal Cayes	CC	acutus_B	3	1e-05	0.99998	1	1e-05
CA.P2B2.NC	CA	Northern Cayes	NC	acutus_B	3	0.05321	0.94678	1	1e-05
CA.P2B3.CC	CA	Coastal Cayes	CC	acutus_B	3	1e-05	0.99998	1	1e-05
CA.P2B4.CC	CA	Coastal Cayes	CC	acutus_B	3	1e-05	0.99998	1	1e-05
CA.P2B7.CC	CA	Coastal Cayes	CC	acutus_B	3	1e-05	0.99998	1	1e-05
CA.P2B8.CC	CA	Coastal Cayes	CC	acutus_B	3	1e-05	0.99998	1	1e-05
CA.P2C3.CC	CA	Coastal Cayes	CC	acutus_B	3	1e-05	0.99998	1	1e-05
CA.P2C4.CC	CA	Coastal Cayes	CC	acutus_B	3	1e-05	0.99998	1	1e-05
CA.P2C5.CC	CA	Coastal Cayes	CC	acutus_B	3	0.069794	0.930196	1	1e-05
CA.P2C7.CC	CA	Coastal Cayes	CC	acutus_B	3	1e-05	0.99998	1	1e-05
CA.P2D2.NC	CA	Northern Cayes	NC	acutus_B	3	1e-05	0.99998	1	1e-05
CA.P2D7.CC	CA	Coastal Cayes	CC	acutus_B	3	0.031949	0.968041	1	1e-05
CA.P2E3.CC	CA	Coastal Cayes	CC	acutus_B	3	1e-05	0.99998	1	1e-05
CA.P2E4.CC	CA	Coastal Cayes	CC	acutus_B	3	1e-05	0.99998	1	1e-05
CA.P2E5.CC	CA	Coastal Cayes	CC	acutus_B	3	1e-05	0.99998	1	1e-05
CA.P2E7.CC	CA	Coastal Cayes	CC	acutus_B	3	1e-05	0.99998	1	1e-05
CA.P2E8.CC	CA	Coastal Cayes	CC	acutus_B	3	1e-05	0.99998	1	1e-05
CA.P2F2.NC	CA	Northern Cayes	NC	acutus_B	3	0.072641	0.927349	1	1e-05
CA.P2F3.CC	CA	Coastal Cayes	CC	acutus_B	3	0.037054	0.962936	1	1e-05
CA.P2F4.CC	CA	Coastal Cayes	CC	acutus_B	3	1e-05	0.99998	1	1e-05
CA.P2F7.CC	CA	Coastal Cayes	CC	acutus_B	3	1e-05	0.99998	1	1e-05
CA.P2F8.NC	CA	Northern Cayes	NC	acutus_B	3	0.084669	0.915321	1	1e-05
CA.P2G3.CC	CA	Coastal Cayes	CC	acutus_B	3	1e-05	0.99998	1	1e-05
CA.P2G4.CC	CA	Coastal Cayes	CC	acutus_B	3	1e-05	0.99998	1	1e-05
CA.P2G5.CC	CA	Coastal Cayes	CC	acutus_B	3	1e-05	0.99998	1	1e-05
CA.P2G7.CC	CA	Coastal Cayes	CC	acutus_B	3	0.070934	0.929056	1	1e-05
CA.P2G8.CC	CA	Coastal Cayes	CC	acutus_B	3	1e-05	0.99998	1	1e-05
CA.P2H5.NA	CA	NA	NA	acutus_B	3	1e-05	0.99998	1	1e-05
CA.P2H8.CC	CA	Coastal Cayes	CC	acutus_B	3	1e-05	0.99998	1	1e-05
CA.P3A11.CC	CA	Coastal Cayes	CC	acutus_B	3	1e-05	0.971275	0.97	0.028715
CA.P3B10.NC	CA	Northern Cayes	NC	acutus_B	3	1e-05	0.957952	0.96	0.042038
CA.P3B9.NC	CA	Northern Cayes	NC	acutus_B	3	0.078085	0.921905	1	1e-05
CA.P3C9.NC	CA	Northern Cayes	NC	acutus_B	3	1e-05	0.99998	1	1e-05
CA.P3D10.CC	CA	Coastal Cayes	CC	acutus_B	3	1e-05	0.971873	0.97	0.028117
CA.P3D9.NC	CA	Northern Cayes	NC	acutus_B	3	1e-05	0.99998	1	1e-05
CA.P3E10.CC	CA	Coastal Cayes	CC	acutus_B	3	1e-05	0.977902	0.98	0.022088
CA.P3F10.CC	CA	Coastal Cayes	CC	acutus_B	3	1e-05	0.99998	1	1e-05
CA.P3G10.CC	CA	Coastal Cayes	CC	acutus_B	3	1e-05	0.987427	0.99	0.012563
CA.P3G9.NC	CA	Northern Cayes	NC	acutus_B	3	0.044616	0.937767	0.98	0.017617
CA.P3H10.CC	CA	Coastal Cayes	CC	acutus_B	3	1e-05	0.976498	0.98	0.023492
CA.P3H9.NC	CA	Northern Cayes	NC	acutus_B	3	0.068368	0.931622	1	1e-05
CA.P4B1.CC	CA	Coastal Cayes	CC	acutus_B	3	0.080698	0.919292	1	1e-05
MCA.P4G2.CB	MCA	Cockscomb Basin	CB	acutus_B	3	1e-05	0.99998	1	1e-05
CA.PC10.NC	CA	Northern Cayes	NC	acutus_B	3	1e-05	0.99998	1	1e-05
CA.PC11.NC	CA	Northern Cayes	NC	acutus_B	3	1e-05	0.99998	1	1e-05
CA.PC12.NC	CA	Northern Cayes	NC	acutus_B	3	1e-05	0.99998	1	1e-05
CA.PC14.CC	CA	Coastal Cayes	CC	acutus_B	3	1e-05	0.99998	1	1e-05
CA.PC15.CC	CA	Coastal Cayes	CC	acutus_B	3	1e-05	0.99998	1	1e-05
CA.PC16.CC	CA	Coastal Cayes	CC	acutus_B	3	1e-05	0.99998	1	1e-05
CA.PC9.NC	CA	Northern Cayes	NC	acutus_B	3	1e-05	0.99998	1	1e-05
CM.P1A10.NRW	CM	New River Watershed	NRW	C. moreletii	1	1e-05	1e-05	0	0.99998
CM.P1B10.NRW	CM	New River Watershed	NRW	C. moreletii	1	1e-05	0.021732	0.02	0.978258
CM.P1B3.NRW	CM	New River Watershed	NRW	C. moreletii	1	1e-05	0.023134	0.02	0.976856
CM.P1C10.NRW	CM	New River Watershed	NRW	C. moreletii	1	1e-05	0.025744	0.03	0.974246
CM.P1C9.NSLW	CM	N/S Lagoon Watershed	NSLW	C. moreletii	1	0.075497	0.01154	0.09	0.912963
CM.P1D10.NRW	CM	New River Watershed	NRW	C. moreletii	1	0.014231	1e-05	0.01	0.985759
CM.P1D3.NRW	CM	New River Watershed	NRW	C. moreletii	1	1e-05	1e-05	0	0.99998
CM.P1D9.NRW	CM	New River Watershed	NRW	C. moreletii	1	1e-05	1e-05	0	0.99998
CM.P1E10.NRW	CM	New River Watershed	NRW	C. moreletii	1	1e-05	0.016923	0.02	0.983067
HY.P1E4.NRW	HY	New River Watershed	NRW	C. moreletii	1	0.025295	0.035516	0.06	0.93919
CM.P1F10.NRW	CM	New River Watershed	NRW	C. moreletii	1	1e-05	1e-05	0	0.99998
HY.P1F4.CB	HY	Cockscomb Basin	CB	C. moreletii	1	0.071857	0.002786	0.07	0.925358
HY.P1F5.NRW	HY	New River Watershed	NRW	C. moreletii	1	0.083019	0.002605	0.09	0.914376
CM.P1G10.NRW	CM	New River Watershed	NRW	C. moreletii	1	1e-05	1e-05	0	0.99998
HY.P1G3.NRW	HY	New River Watershed	NRW	C. moreletii	1	0.000925	0.016218	0.02	0.982856
HY.P1G4.CB	HY	Cockscomb Basin	CB	C. moreletii	1	0.015077	0.03494	0.05	0.949983
CM.P1H10.NRW	CM	New River Watershed	NRW	C. moreletii	1	0.013438	1e-05	0.01	0.986552
CM.P1H9.NRW	CM	New River Watershed	NRW	C. moreletii	1	0.00709	0.024987	0.03	0.967923
CM.P2A10.NRW	CM	Belize River Watershed	BRW	C. moreletii	1	0.022729	0.029996	0.05	0.947275
CM.P2A12.NRW	CM	New River Watershed	NRW	C. moreletii	1	1e-05	1e-05	0	0.99998
CM.P2B12.NRW	CM	New River Watershed	NRW	C. moreletii	1	1e-05	1e-05	0	0.99998
CM.P2C10.NRW	CM	Belize River Watershed	BRW	C. moreletii	1	1e-05	0.01259	0.01	0.9874
CM.P2C12.NRW	CM	New River Watershed	NRW	C. moreletii	1	1e-05	1e-05	0	0.99998
CM.P2C6.NRW	CM	New River Watershed	NRW	C. moreletii	1	1e-05	1e-05	0	0.99998
CM.P2D10.NRW	CM	Belize River Watershed	BRW	C. moreletii	1	1e-05	0.007306	0.01	0.992684
HY.P2D11.RHW	HY	Rio Hondo Watershed	RHW	C. moreletii	1	1e-05	0.01051	0.01	0.98948
CM.P2D12.NRW	CM	New River Watershed	NRW	C. moreletii	1	1e-05	0.004989	0	0.995001
HY.P2D9.CB	HY	Cockscomb Basin	CB	C. moreletii	1	0.042206	0.03401	0.08	0.923783
CM.P2E10.NRW	CM	Belize River Watershed	BRW	C. moreletii	1	0.017715	0.046178	0.06	0.936107
CM.P2E12.NRW	CM	New River Watershed	NRW	C. moreletii	1	1e-05	1e-05	0	0.99998
CM.P2F10.NRW	CM	Belize River Watershed	BRW	C. moreletii	1	1e-05	0.016064	0.02	0.983926
CM.P2F11.CB	CM	Cockscomb Basin	CB	C. moreletii	1	1e-05	0.051203	0.05	0.948787
CM.P2G12.NRW	CM	New River Watershed	NRW	C. moreletii	1	1e-05	1e-05	0	0.99998
CM.P2G6.NRW	CM	New River Watershed	NRW	C. moreletii	1	1e-05	0.03787	0.04	0.96212
CM.P2G9.NRW	CM	New River Watershed	NRW	C. moreletii	1	1e-05	0.050085	0.05	0.949905
CM.P2H11.NRW	CM	New River Watershed	NRW	C. moreletii	1	1e-05	1e-05	0	0.99998
CM.P2H12.NRW	CM	New River Watershed	NRW	C. moreletii	1	1e-05	1e-05	0	0.99998
CM.P2H9.NRW	CM	Belize River Watershed	BRW	C. moreletii	1	0.025813	0.010629	0.04	0.963558
CM.P3A1.NRW	CM	New River Watershed	NRW	C. moreletii	1	1e-05	1e-05	0	0.99998
HY.P3A2.NRW	HY	New River Watershed	NRW	C. moreletii	1	1e-05	1e-05	0	0.99998
CM.P3A3.NRW	CM	New River Watershed	NRW	C. moreletii	1	1e-05	1e-05	0	0.99998
CM.P3A4.NRW	CM	New River Watershed	NRW	C. moreletii	1	0.004818	0.005308	0.01	0.989874
HY.P3A5.NRW	HY	New River Watershed	NRW	C. moreletii	1	1e-05	1e-05	0	0.99998
CM.P3A6.CF	CM	Chiquibul Forest	CF	C. moreletii	1	0.027616	0.026782	0.05	0.945602
CM.P3A7.CB	CM	Cockscomb Basin	CB	C. moreletii	1	1e-05	1e-05	0	0.99998
CM.P3B1.NRW	CM	New River Watershed	NRW	C. moreletii	1	1e-05	1e-05	0	0.99998
HY.P3B2.NRW	HY	New River Watershed	NRW	C. moreletii	1	1e-05	1e-05	0	0.99998
CM.P3B3.NRW	CM	New River Watershed	NRW	C. moreletii	1	1e-05	1e-05	0	0.99998
HY.P3B4.NRW	HY	New River Watershed	NRW	C. moreletii	1	1e-05	1e-05	0	0.99998
HY.P3B5.NRW	HY	New River Watershed	NRW	C. moreletii	1	1e-05	1e-05	0	0.99998
CM.P3B6.NRW	CM	New River Watershed	NRW	C. moreletii	1	1e-05	0.029634	0.03	0.970356
HY.P3B8.CB	HY	Cockscomb Basin	CB	C. moreletii	1	0.061542	1e-05	0.06	0.938448
CM.P3C1.NRW	CM	New River Watershed	NRW	C. moreletii	1	1e-05	1e-05	0	0.99998
HY.P3C2.BRW	HY	Belize River Watershed	BRW	C. moreletii	1	0.018407	0.02618	0.04	0.955413
CM.P3C3.NRW	CM	New River Watershed	NRW	C. moreletii	1	1e-05	1e-05	0	0.99998
HY.P3C5.NRW	HY	New River Watershed	NRW	C. moreletii	1	1e-05	1e-05	0	0.99998
CM.P3C6.NRW	CM	New River Watershed	NRW	C. moreletii	1	1e-05	1e-05	0	0.99998
CM.P3C8.CB	CM	Cockscomb Basin	CB	C. moreletii	1	0.012161	1e-05	0.01	0.987829
HY.P3D2.BRW	HY	Belize River Watershed	BRW	C. moreletii	1	0.027335	1e-05	0.03	0.972655
CM.P3D3.NRW	CM	New River Watershed	NRW	C. moreletii	1	1e-05	1e-05	0	0.99998
HY.P3D4.BRW	HY	Belize River Watershed	BRW	C. moreletii	1	0.013096	0.037934	0.05	0.94897
HY.P3D5.NRW	HY	New River Watershed	NRW	C. moreletii	1	1e-05	1e-05	0	0.99998
CM.P3D6.RHW	CM	Rio Hondo Watershed	RHW	C. moreletii	1	1e-05	0.011731	0.01	0.988259
HY.P3E2.BRW	HY	Belize River Watershed	BRW	C. moreletii	1	0.006517	0.03061	0.04	0.962873
CM.P3E3.NRW	CM	New River Watershed	NRW	C. moreletii	1	1e-05	1e-05	0	0.99998
HY.P3E4.BRW	HY	Belize River Watershed	BRW	C. moreletii	1	0.019394	1e-05	0.02	0.980596
HY.P3E5.CB	HY	Cockscomb Basin	CB	C. moreletii	1	0.002451	0.025836	0.03	0.971713
HY.P3E8.NA	HY	NA	NA	C. moreletii	1	1e-05	1e-05	0	0.99998
CM.P3F2.NA	CM	NA	NA	C. moreletii	1	0.082881	1e-05	0.08	0.917109
CM.P3F3.NRW	CM	New River Watershed	NRW	C. moreletii	1	1e-05	1e-05	0	0.99998
HY.P3F4.BRW	HY	Belize River Watershed	BRW	C. moreletii	1	1e-05	1e-05	0	0.99998
HY.P3F5.CB	HY	Cockscomb Basin	CB	C. moreletii	1	0.062531	0.016132	0.08	0.921338
CM.P3F6.NTW	CM	Northern Toledo Watershed	NTW	C. moreletii	1	0.015152	1e-05	0.02	0.984838
CM.P3F7.CB	CM	Cockscomb Basin	CB	C. moreletii	1	0.081647	0.001434	0.08	0.91692
CM.P3F8.CB	CM	Cockscomb Basin	CB	C. moreletii	1	0.074851	1e-05	0.07	0.925139
CM.P3G3.NRW	CM	New River Watershed	NRW	C. moreletii	1	1e-05	1e-05	0	0.99998
CM.P3G4.NRW	CM	New River Watershed	NRW	C. moreletii	1	1e-05	0.014381	0.01	0.985609
HY.P3G5.CB	HY	Cockscomb Basin	CB	C. moreletii	1	0.069667	1e-05	0.07	0.930323
CM.P3G7.CB	CM	Cockscomb Basin	CB	C. moreletii	1	0.044617	1e-05	0.04	0.955373
CM.P3G8.CB	CM	Cockscomb Basin	CB	C. moreletii	1	0.070241	0.000381	0.07	0.929378
CM.P3H3.NRW	CM	New River Watershed	NRW	C. moreletii	1	1e-05	1e-05	0	0.99998
HY.P3H4.NRW	HY	New River Watershed	NRW	C. moreletii	1	1e-05	1e-05	0	0.99998
HY.P3H5.BRW	HY	Belize River Watershed	BRW	C. moreletii	1	1e-05	0.027224	0.03	0.972766
CM.P4E1.CB	CM	Cockscomb Basin	CB	C. moreletii	1	0.079271	1e-05	0.08	0.920719
HY.P4E2.CB	HY	Cockscomb Basin	CB	C. moreletii	1	0.050523	0.046669	0.1	0.902808
CM.PC2.CF	CM	Chiquibul Forest	CF	C. moreletii	1	0.013664	0.051453	0.07	0.934883
CM.PC5.CF	CM	Chiquibul Forest	CF	C. moreletii	1	0.02853	0.033726	0.06	0.937744
CM.PC6.NRW	CM	New River Watershed	NRW	C. moreletii	1	0.008471	1e-05	0.01	0.991519
CM.PC7.NRW	CM	New River Watershed	NRW	C. moreletii	1	1e-05	1e-05	0	0.99998
CM.PC8.NRW	CM	New River Watershed	NRW	C. moreletii	1	1e-05	0.001246	0	0.998744
MCA.P1A7.CB	MCA	Cockscomb Basin	CB	Hybrid	2	0.522519	1e-05	0.52	0.477471
MCA.P1A8.CB	MCA	Cockscomb Basin	CB	Hybrid	2	0.568029	1e-05	0.57	0.431961
HY.P1B4.NA	HY	NA	NA	Hybrid	1	0.464501	1e-05	0.46	0.535489
HY.P1B5.CB	HY	Cockscomb Basin	CB	Hybrid	2	0.564361	1e-05	0.56	0.435629
MCA.P1B7.CB	MCA	Cockscomb Basin	CB	Hybrid	2	0.530232	1e-05	0.53	0.469758
MCA.P1C6.NTW	MCA	Northern Toledo Watershed	NTW	Hybrid	2	0.503437	0.092381	0.6	0.404182
MCA.P1C7.CB	MCA	Cockscomb Basin	CB	Hybrid	2	0.540879	1e-05	0.54	0.459111
MCA.P1D7.CB	MCA	Cockscomb Basin	CB	Hybrid	2	0.555101	1e-05	0.56	0.444889
MCA.P1E7.CB	MCA	Cockscomb Basin	CB	Hybrid	2	0.505849	1e-05	0.51	0.494141
HY.P2B11.CB	HY	Cockscomb Basin	CB	Hybrid	1	0.479332	0.021521	0.5	0.499147
HY.P2H6.CB	HY	Cockscomb Basin	CB	Hybrid	1	0.193637	0.230339	0.42	0.576024
CM.P4D1.NSLW	CM	N/S Lagoon Watershed	NSLW	Hybrid	1	0.366874	0.185688	0.55	0.447438
HY.P1A2.NTW	HY	Northern Toledo Watershed	NTW	Hybrid_acutus_A	2	0.661813	0.121641	0.78	0.216546
HY.P1A4.CB	HY	Cockscomb Basin	CB	Hybrid_acutus_A	2	0.824011	1e-05	0.82	0.175979
HY.P1A5.CB	HY	Cockscomb Basin	CB	Hybrid_acutus_A	2	0.728224	1e-05	0.73	0.271766
MCA.P1B2.STW	MCA	Southern Toledo Watershed	STW	Hybrid_acutus_A	2	0.880809	0.054335	0.94	0.064855
MCA.P1B6.CB	MCA	Cockscomb Basin	CB	Hybrid_acutus_A	2	0.800724	0.02847	0.83	0.170807
MCA.P1B8.CB	MCA	Cockscomb Basin	CB	Hybrid_acutus_A	2	0.761839	1e-05	0.76	0.238151
MCA.P1C5.CB	MCA	Cockscomb Basin	CB	Hybrid_acutus_A	2	0.89284	1e-05	0.89	0.10715
HY.P1D4.NA	HY	NA	NA	Hybrid_acutus_A	2	0.863685	1e-05	0.86	0.136305
MCA.P1D6.STW	MCA	Southern Toledo Watershed	STW	Hybrid_acutus_A	2	0.885663	0.114327	1	1e-05
MCA.P1D8.CB	MCA	Cockscomb Basin	CB	Hybrid_acutus_A	2	0.830915	1e-05	0.83	0.169075
MCA.P1E8.CB	MCA	Cockscomb Basin	CB	Hybrid_acutus_A	2	0.788388	1e-05	0.79	0.211602
MCA.P1F8.NTW	MCA	Northern Toledo Watershed	NTW	Hybrid_acutus_A	2	0.740445	0.147615	0.89	0.11194
MCA.P1G5.CB	MCA	Cockscomb Basin	CB	Hybrid_acutus_A	2	0.647673	0.141919	0.79	0.210408
MCA.P1H5.CB	MCA	Cockscomb Basin	CB	Hybrid_acutus_A	2	0.793063	1e-05	0.79	0.206927
MCA.P1H6.CB	MCA	Cockscomb Basin	CB	Hybrid_acutus_A	2	0.724714	0.249655	0.97	0.025632
MCA.P1H7.CB	MCA	Cockscomb Basin	CB	Hybrid_acutus_A	2	0.62316	1e-05	0.62	0.37683
MCA.P1H8.BRW	MCA	Belize River Watershed	BRW	Hybrid_acutus_A	2	0.831962	1e-05	0.83	0.168028
MCA.P2A9.CB	MCA	Cockscomb Basin	CB	Hybrid_acutus_A	2	0.777689	1e-05	0.78	0.222301
HY.P2C9.CB	HY	Cockscomb Basin	CB	Hybrid_acutus_A	2	0.789308	1e-05	0.79	0.210682
MCA.P2G10.NA	MCA	NA	NA	Hybrid_acutus_A	2	0.804379	0.02704	0.83	0.168581
MCA.P3B11.CB	MCA	Cockscomb Basin	CB	Hybrid_acutus_A	2	0.890035	1e-05	0.89	0.109955
MCA.P3E11.STW	MCA	Southern Toledo Watershed	STW	Hybrid_acutus_A	2	0.840826	1e-05	0.84	0.159164
CA.P1D11.NC	CA	Northern Cayes	NC	Hybrid_acutus_B	3	0.151691	0.843013	0.99	0.005296
CA.P1D12.NC	CA	Northern Cayes	NC	Hybrid_acutus_B	3	0.152204	0.835657	0.99	0.012139
MCA.P1D5.BRW	MCA	Belize River Watershed	BRW	Hybrid_acutus_B	3	0.234513	0.706687	0.94	0.058801
MCA.P1F7.BC	MCA	Belize River Watershed	BRW	Hybrid_acutus_B	3	0.097739	0.888979	0.99	0.013281
CA.P1G12.NC	CA	Northern Cayes	NC	Hybrid_acutus_B	3	0.164789	0.835201	1	1e-05
CA.P2A2.NC	CA	Northern Cayes	NC	Hybrid_acutus_B	3	0.197025	0.784576	0.98	0.018398
CA.P2C2.NC	CA	Northern Cayes	NC	Hybrid_acutus_B	3	0.205943	0.759082	0.97	0.034975
CA.P3C10.NC	CA	Northern Cayes	NC	Hybrid_acutus_B	3	0.160427	0.72898	0.89	0.110592
CA.P3E9.NC	CA	Northern Cayes	NC	Hybrid_acutus_B	3	0.108182	0.881507	0.99	0.010311
MCA.P1C11.NRW	MCA	New River Watershed	NRW	Hybrid_moreletii	1	0.018613	0.101113	0.12	0.880274
HY.P2A6.CB	HY	Cockscomb Basin	CB	Hybrid_moreletii	1	0.059428	0.046117	0.11	0.894455
CM.P2B10.NRW	CM	Belize River Watershed	BRW	Hybrid_moreletii	1	0.157964	0.199297	0.36	0.642739
HY.P2B6.CB	HY	Cockscomb Basin	CB	Hybrid_moreletii	1	0.168314	0.021177	0.19	0.810509
CM.P3A8.CB	CM	Cockscomb Basin	CB	Hybrid_moreletii	1	0.100806	1e-05	0.1	0.899184
HY.P3B7.CB	HY	Cockscomb Basin	CB	Hybrid_moreletii	1	0.153507	0.153495	0.31	0.692998
HY.P3C4.CB	HY	Cockscomb Basin	CB	Hybrid_moreletii	1	0.164974	0.045323	0.21	0.789704
CM.P3C7.CB	CM	Cockscomb Basin	CB	Hybrid_moreletii	1	0.11339	0.076707	0.19	0.809903
CM.P3D7.CB	CM	Cockscomb Basin	CB	Hybrid_moreletii	1	0.084522	0.040034	0.12	0.875444
HY.P3D8.NA	HY	NA	NA	Hybrid_moreletii	1	0.054519	0.101424	0.16	0.844057
CM.P3E6.NA	CM	NA	NA	Hybrid_moreletii	1	0.14417	0.094078	0.24	0.761752
CM.P3E7.CB	CM	Cockscomb Basin	CB	Hybrid_moreletii	1	0.123417	1e-05	0.12	0.876573
HY.P3G1.CB	HY	Cockscomb Basin	CB	Hybrid_moreletii	1	0.114526	0.023565	0.14	0.861909
CM.P3G2.CB	CM	Cockscomb Basin	CB	Hybrid_moreletii	1	0.356912	1e-05	0.36	0.643078
CM.P3G6.CB	CM	Cockscomb Basin	CB	Hybrid_moreletii	1	0.116551	1e-05	0.12	0.883439
CM.P3H2.NRW	CM	New River Watershed	NRW	Hybrid_moreletii	1	0.040917	0.069834	0.11	0.889249
HY.P3H6.CB	HY	Cockscomb Basin	CB	Hybrid_moreletii	1	0.027612	0.125528	0.15	0.84686
HY.P3H8.CB	HY	Cockscomb Basin	CB	Hybrid_moreletii	1	0.377373	1e-05	0.38	0.622617
HY.P4A2.CB	HY	Cockscomb Basin	CB	Hybrid_moreletii	1	0.260526	1e-05	0.26	0.739464
CM.P4B2.NA	CM	NA	NA	Hybrid_moreletii	1	0.063859	0.039998	0.1	0.896143
CM.P4G1.CB	CM	Cockscomb Basin	CB	Hybrid_moreletii	1	0.038567	0.067789	0.11	0.893644
CM.PC3.CF	CM	Chiquibul Forest	CF	Hybrid_moreletii	1	0.027612	0.079909	0.11	0.892479
CM.PC4.CF	CM	Chiquibul Forest	CF	Hybrid_moreletii	1	0.039184	0.063087	0.1	0.897729

## Sheet: Sheet1
Ad_cluster_assignment
C. moreletii
acutus_B
Hybrid_acutus_A
Hybrid_acutus_A
Hybrid_acutus_A
acutus
Hybrid
Hybrid
acutus
C. moreletii
acutus_B
acutus_B
Hybrid_acutus_A
C. moreletii
Hybrid
Hybrid
Hybrid_acutus_A
Hybrid
Hybrid_acutus_A
acutus
C. moreletii
Hybrid_moreletii
acutus_B
acutus_A
acutus_A
Hybrid_acutus_A
Hybrid
Hybrid
C. moreletii
C. moreletii
Hybrid_acutus_B
Hybrid_acutus_B
acutus_A
C. moreletii
Hybrid_acutus_A
Hybrid_acutus_B
Hybrid_acutus_A
Hybrid
Hybrid_acutus_A
C. moreletii
C. moreletii
acutus_B
acutus_B
acutus_A
C. moreletii
acutus_A
acutus_A
Hybrid
Hybrid_acutus_A
C. moreletii
acutus_B
acutus_A
C. moreletii
C. moreletii
acutus_A
Hybrid_acutus_B
Hybrid_acutus_A
C. moreletii
acutus_B
Hybrid_acutus_B
acutus_A
C. moreletii
C. moreletii
Hybrid_acutus_A
acutus_A
acutus
acutus_A
C. moreletii
acutus_B
acutus_A
Hybrid_acutus_A
Hybrid_acutus_A
Hybrid_acutus_A
Hybrid_acutus_A
C. moreletii
C. moreletii
C. moreletii
Hybrid_acutus_B
acutus_B
acutus_B
acutus_B
Hybrid_moreletii
Hybrid_acutus_A
Hybrid_moreletii
Hybrid
C. moreletii
acutus_B
acutus_B
acutus_B
Hybrid_moreletii
acutus_B
acutus_B
acutus_A
C. moreletii
C. moreletii
Hybrid_acutus_B
acutus_B
acutus_B
acutus_B
C. moreletii
acutus_B
Hybrid_acutus_A
C. moreletii
C. moreletii
C. moreletii
acutus_B
acutus_B
C. moreletii
C. moreletii
C. moreletii
acutus_B
acutus_B
acutus_B
acutus_B
acutus_B
acutus
C. moreletii
C. moreletii
acutus_B
acutus_B
acutus_B
acutus_B
acutus_B
acutus
Hybrid_acutus_A
C. moreletii
acutus_B
acutus_B
acutus_B
C. moreletii
acutus_B
acutus_B
C. moreletii
acutus_A
C. moreletii
C. moreletii
acutus_B
Hybrid
acutus_B
C. moreletii
C. moreletii
acutus_B
C. moreletii
C. moreletii
C. moreletii
C. moreletii
C. moreletii
C. moreletii
Hybrid_moreletii
C. moreletii
acutus_B
Hybrid_acutus_A
C. moreletii
C. moreletii
C. moreletii
C. moreletii
C. moreletii
Hybrid_moreletii
C. moreletii
acutus_B
C. moreletii
Hybrid_acutus_B
acutus_A
C. moreletii
C. moreletii
Hybrid_moreletii
C. moreletii
C. moreletii
Hybrid_moreletii
C. moreletii
acutus_B
acutus_B
acutus_A
C. moreletii
C. moreletii
C. moreletii
C. moreletii
C. moreletii
Hybrid_moreletii
Hybrid_moreletii
acutus_B
acutus_B
Hybrid_acutus_A
C. moreletii
C. moreletii
C. moreletii
C. moreletii
Hybrid_moreletii
Hybrid_moreletii
C. moreletii
Hybrid_acutus_B
acutus_B
C. moreletii
C. moreletii
C. moreletii
C. moreletii
C. moreletii
C. moreletii
C. moreletii
Hybrid_moreletii
acutus_B
acutus
Hybrid_moreletii
C. moreletii
C. moreletii
C. moreletii
Hybrid_moreletii
C. moreletii
C. moreletii
acutus_B
acutus_B
acutus
Hybrid_moreletii
C. moreletii
C. moreletii
C. moreletii
Hybrid_moreletii
Hybrid_moreletii
acutus_B
Hybrid_moreletii
acutus_B
Hybrid_moreletii
acutus_A
Hybrid
C. moreletii
C. moreletii
Hybrid_moreletii
acutus_B
acutus_B
acutus_B
acutus_B
acutus_B
acutus_B
acutus_B
C. moreletii
Hybrid_moreletii
Hybrid_moreletii
C. moreletii
C. moreletii
C. moreletii
C. moreletii
acutus_B
