# Supplementary material
Source: Research Square preprint supplement (doi:10.21203/rs.3.rs-9024495/v1)
Supplement: Supplementary file 5 [file afd22585b4e02f44c7f4d608.xlsx]

## Sheet: Sheet1
Sample ID	n_hom_P1	n_het	n_hom_P2	p_het
HY.P3E4.BRW	187	0	0	0
HY.P3F4.BRW	182	0	0	0
CM.P3A7.CB	181	0	0	0
CM.P3C8.CB	187	0	0	0
HY.P3E8.NA	177	0	0	0
CM.P1A10.NRW	179	0	0	0
CM.P1D10.NRW	177	0	0	0
CM.P1D3.NRW	187	0	0	0
CM.P1D9.NRW	175	0	0	0
CM.P1E10.NRW	176	0	0	0
CM.P1F10.NRW	183	0	0	0
CM.P1G10.NRW	186	0	0	0
CM.P2A12.NRW	188	0	0	0
CM.P2B12.NRW	183	0	0	0
CM.P2C10.NRW	185	0	0	0
CM.P2C12.NRW	188	0	0	0
CM.P2C6.NRW	179	0	0	0
CM.P2D10.NRW	185	0	0	0
CM.P2D12.NRW	185	0	0	0
CM.P2E12.NRW	188	0	0	0
CM.P2F10.NRW	183	0	0	0
CM.P2G12.NRW	185	0	0	0
CM.P2H12.NRW	186	0	0	0
CM.P3A1.NRW	185	0	0	0
CM.P3A3.NRW	188	0	0	0
CM.P3A4.NRW	188	0	0	0
CM.P3B1.NRW	184	0	0	0
CM.P3B3.NRW	187	0	0	0
CM.P3C1.NRW	187	0	0	0
CM.P3C3.NRW	188	0	0	0
CM.P3C6.NRW	186	0	0	0
CM.P3D3.NRW	188	0	0	0
CM.P3E3.NRW	186	0	0	0
CM.P3F3.NRW	187	0	0	0
CM.P3G3.NRW	188	0	0	0
CM.P3G4.NRW	185	0	0	0
CM.P3H3.NRW	182	0	0	0
CM.PC6.NRW	188	0	0	0
CM.PC7.NRW	188	0	0	0
CM.PC8.NRW	188	0	0	0
HY.P1G3.NRW	166	0	0	0
HY.P3A2.NRW	186	0	0	0
HY.P3A5.NRW	184	0	0	0
HY.P3B2.NRW	181	0	0	0
HY.P3B4.NRW	186	0	0	0
HY.P3B5.NRW	187	0	0	0
HY.P3C5.NRW	186	0	0	0
HY.P3D5.NRW	184	0	0	0
HY.P3H4.NRW	185	0	0	0
CM.P3F6.NTW	176	0	0	0
HY.P2D11.RHW	187	0	0	0
CM.P3D6.RHW	184	0	0	0
CM.PC3.CF	144	42	0	0.226
CM.PC4.CF	141	31	16	0.165
HY.P2A6.CB	163	18	2	0.098
HY.P3C4.CB	152	36	0	0.191
HY.P3G1.CB	150	36	2	0.191
CM.P3A8.CB	164	23	0	0.123
CM.P3C7.CB	135	31	17	0.169
CM.P3D7.CB	137	48	0	0.259
CM.P3E7.CB	123	48	8	0.268
CM.P3G2.CB	84	76	21	0.42
CM.P3G6.CB	131	50	4	0.27
HY.P2B11.CB	67	61	55	0.333
HY.P2B6.CB	109	60	11	0.333
HY.P2C9.CB	4	72	112	0.383
HY.P2H6.CB	66	95	27	0.505
HY.P3B7.CB	49	114	15	0.64
HY.P3H6.CB	89	56	0	0.386
HY.P3H8.CB	54	61	17	0.462
HY.P4A2.CB	65	66	10	0.468
MCA.P1A7.CB	47	90	49	0.484
MCA.P1A8.CB	41	92	47	0.511
MCA.P1B6.CB	0	54	126	0.3
MCA.P1B7.CB	74	58	41	0.335
MCA.P1B8.CB	17	64	100	0.354
MCA.P1D7.CB	44	90	25	0.566
MCA.P1C5.CB	1	40	134	0.229
MCA.P1C7.CB	44	96	29	0.568
MCA.P1D8.CB	3	92	89	0.5
MCA.P1E7.CB	21	82	75	0.461
MCA.P1E8.CB	3	89	86	0.5
MCA.P1G5.CB	14	77	81	0.448
MCA.P1H7.CB	32	73	56	0.453
HY.P1A4.CB	2	52	109	0.319
HY.P1A5.CB	4	99	68	0.579
HY.P1B5.CB	24	62	66	0.408
CM.P3E6.NA	131	31	21	0.169
CM.P4B2.NA	98	61	3	0.377
HY.P1B4.NA	70	73	39	0.401
HY.P1D4.NA	2	76	106	0.413
HY.P3D8.NA	138	28	16	0.154
MCA.P2G10.NA	2	63	123	0.335
CM.P3H2.NRW	140	14	4	0.089
CM.P2B10.NRW	41	120	17	0.674
CM.P4D1.NSLW	24	118	23	0.715
MCA.P1C6.NTW	21	119	46	0.64
HY.P1A2.NTW	16	76	84	0.432
MCA.P1F8.NTW	1	46	138	0.249
MCA.P1D5.BRW	1	3	169	0.017
MCA.P1H8.BRW	5	84	81	0.494
MCA.P3E11.STW	6	76	66	0.514
MCA.P1B2.STW	0	56	109	0.339
MCA.P1D6.STW	0	16	170	0.086
CA.P2C2.NC	0	21	167	0.112
CA.P2A2.NC	0	16	171	0.086
CA.P1D12.NC	0	12	170	0.066
CA.P1G12.NC	0	12	176	0.064
CA.P3E9.NC	0	11	177	0.059
CA.P1D11.NC	0	1	183	0.005
MCA.P4G2.CB	0	0	179	0
CA.P2A3.CC	0	0	185	0
CA.P2A5.CC	0	0	188	0
CA.P2B3.CC	0	0	188	0
CA.P2B4.CC	0	0	188	0
CA.P2B7.CC	0	0	188	0
CA.P2B8.CC	0	0	188	0
CA.P2C3.CC	0	0	186	0
CA.P2C4.CC	0	0	188	0
CA.P2C7.CC	0	0	186	0
CA.P2E3.CC	0	0	187	0
CA.P2E4.CC	0	0	188	0
CA.P2E5.CC	0	0	188	0
CA.P2E7.CC	0	0	188	0
CA.P2E8.CC	0	0	185	0
CA.P2F4.CC	0	0	188	0
CA.P2F7.CC	0	0	188	0
CA.P2G3.CC	0	0	187	0
CA.P2G4.CC	0	0	188	0
CA.P2G5.CC	0	0	188	0
CA.P2G8.CC	0	0	188	0
CA.P2H8.CC	0	0	186	0
CA.P3F10.CC	0	0	180	0
CA.P3G10.CC	0	0	172	0
CA.PC14.CC	0	0	187	0
CA.PC15.CC	0	0	188	0
CA.PC16.CC	0	0	188	0
CA.P2H5.NA	0	0	188	0
MCA.P2H10.NA	0	0	186	0
CA.P1A12.NC	0	0	188	0
CA.P1C12.NC	0	0	188	0
CA.P1E11.NC	0	0	183	0
CA.P1F12.NC	0	0	188	0
CA.P1G11.NC	0	0	184	0
CA.P1H12.NC	0	0	187	0
CA.P2D2.NC	0	0	188	0
CA.P3C9.NC	0	0	179	0
CA.P3D9.NC	0	0	188	0
CA.PC10.NC	0	0	187	0
CA.PC11.NC	0	0	188	0
CA.PC12.NC	0	0	188	0
CA.PC9.NC	0	0	188	0
MCA.P1B11.NRW	0	0	180	0
MCA.P4C1.STW	0	0	181	0
MCA.P1C2.STW	0	0	178	0
MCA.P1D2.STW	0	0	183	0
MCA.P1E2.STW	0	0	186	0
MCA.P1E6.STW	0	0	188	0
MCA.P1F2.STW	0	0	164	0
MCA.P1F6.STW	0	0	188	0
MCA.P1G2.STW	0	0	182	0
MCA.P1H2.STW	0	0	173	0
MCA.P3D11.STW	0	0	177	0
